1 **Single-molecule imaging with cell-derived nanovesicles reveals early binding dynamics at a**  
2 **cyclic nucleotide-gated ion channel**

3

4 Vishal R. Patel<sup>1,3</sup>, Arturo M. Salinas<sup>2</sup>, Darong Qi<sup>1</sup>, Shipra Gupta<sup>1</sup>, David J. Sidote<sup>1</sup>, and Marcel P.  
5 Goldschen-Ohm<sup>1\*</sup>

6 <sup>1</sup>Department of Neuroscience, The University of Texas at Austin

7 <sup>2</sup>Department of Physics, The University of Texas at Austin

8 <sup>3</sup>Dell Medical School, The University of Texas at Austin

9

10 \*Corresponding author: [marcel.goldschen-ohm@austin.utexas.edu](mailto:marcel.goldschen-ohm@austin.utexas.edu)

1 **Abstract**

2 Ligand binding to membrane proteins is critical for many biological signaling processes. However,  
3 individual binding events are rarely directly observed, and their asynchronous dynamics are  
4 occluded in ensemble-averaged measures. For membrane proteins, single-molecule approaches  
5 that resolve these dynamics are challenged by dysfunction in nonnative lipid environments, lack  
6 of access to intracellular sites, and costly sample preparation. Here, we introduce an approach  
7 combining cell-derived nanovesicles, microfluidics, and single-molecule fluorescence  
8 colocalization microscopy to track individual binding events at a cyclic nucleotide-gated TAX-4  
9 ion channel critical for sensory transduction. Our observations reveal dynamics of both nucleotide  
10 binding and a subsequent conformational change likely preceding pore opening. We further show  
11 that binding of the second ligand in the tetrameric channel is less cooperative than previously  
12 estimated from ensemble-averaged binding measures. This approach is broadly applicable to  
13 studies of binding dynamics for proteins with extracellular or intracellular domains in native cell  
14 membrane.

## 1 **Introduction**

2           Ligand binding to specific recognition sites in membrane receptors is crucial for cellular  
3 signaling and pharmacological treatment of its dysfunction. Intrinsic membrane proteins make up  
4 ~30% of the protein encoding genome and are therapeutic targets for ~70% of available drugs<sup>1-3</sup>.  
5 Technological advances have led to an increase in near atomic resolution structures of membrane  
6 receptors complexed with ligands/drugs. These structures provide static snapshots primarily of  
7 endpoints for ligand-activation mechanisms. However, the transient intermediate events  
8 connecting these snapshots often remain unclear. For oligomeric proteins that bind ligand/drug at  
9 multiple active sites, these intermediates define the sequence of binding events and the nature of  
10 cooperative interactions amongst sites (i.e. occupation of one site influencing binding at another)  
11 that govern the concentration-dependence of ligand-induced behavior. Methods that inform on  
12 these processes are important for understanding mechanisms of ligand-activation and aiding the  
13 rational design of novel therapies targeting membrane receptors. However, structures and  
14 ensemble-averaged measures of distinct partially liganded intermediates are difficult to resolve  
15 due to averaging over transient asynchronous events and mixtures of heterogeneous bound states.

16           Single-molecule (SM) approaches are ideal for resolving both heterogeneous states and  
17 asynchronous dynamics. However, their application to studies of ligand binding in membrane  
18 proteins is challenged by costly sample preparation, dysfunction in nonnative lipid or detergent  
19 environments<sup>4-6</sup>, lack of solution access to intracellular sites, and nonspecific dye adsorption to  
20 imaging surfaces. Here, we overcome these challenges by combining cell-derived nanovesicles<sup>7-</sup>  
21 <sup>9</sup>, microfluidics, micro-mirror total internal reflection fluorescence (mmTIRF)<sup>10</sup>, and  
22 colocalization SM spectroscopy<sup>11</sup> to optically track binding and unbinding of individual  
23 fluorescently-tagged ligands at single membrane proteins. Imaging a ~100  $\mu\text{m} \times 100 \mu\text{m}$  field of

1 view much larger than a confocal spot enables high-throughput data acquisition of up to hundreds  
2 of molecules simultaneously.

3 Cell-derived nano-scale vesicles are an attractive approach for isolating full-length  
4 membrane proteins in their native lipid environment and provide access to extracellular and  
5 intracellular sites due to the stochastic nature of vesicle formation. SM imaging of individual  
6 vesicles has been used to study nicotinic acetylcholine receptor (nAChR) stoichiometry<sup>8</sup> and  
7 mechanisms of membrane curvature sensing<sup>12</sup>. In contrast, live cell-based approaches offer a  
8 native membrane environment<sup>13–15</sup> but are challenged by cell autofluorescence, diffusion within  
9 the membrane, high local protein concentrations that limit SM resolution<sup>16–18</sup>, and lack of access  
10 to intracellular domains. Isolating proteins with patch pipets allows simultaneous optical and  
11 electrical recording<sup>19</sup>, but severely limits throughput to one molecule at a time. Alternative cell-  
12 free approaches such as solubilization in detergent or lipid synthetics can leave the protein locked  
13 into conformations that constrain normal function<sup>4–6</sup> or require stabilizing mutations that may  
14 impose unnatural constraints on protein structure and function<sup>20,21</sup>.

15 As an exemplar system, we use our approach to resolve the binding dynamics of a  
16 fluorescent cyclic nucleotide analog (fcGMP<sup>22,23</sup>) to individual cyclic nucleotide-gated (CNG)  
17 TAX-4 ion channels from *C. elegans* in cell-derived nanovesicles. CNG channels are critical for  
18 visual and olfactory transduction<sup>24</sup>. They are tetramers comprised of four subunits surrounding a  
19 central ion conducting pore<sup>25</sup>. Binding of cGMP or cAMP to intracellular cyclic nucleotide  
20 binding domains (CNBDs), one per subunit, initiates opening of the channel's cation conducting  
21 pore, thereby converting changes in cyclic nucleotide level to changes in membrane potential<sup>24</sup>.  
22 This allows photoreceptors in the visual system to respond to changes in light level via light-  
23 induced hydrolysis of cGMP, and olfactory receptor neurons to respond to odorant-induced

1 synthesis of cAMP<sup>24,26</sup>. Mutations in CNG channels have been linked to progressive vision loss  
2 and color vision abnormalities such as macular degeneration<sup>27-31</sup> as well as olfactory disorders  
3 such as isolated congenital anosmia<sup>32</sup>. Recently, a clinical trial of subretinal *CNGA3* gene therapy  
4 in individuals with complete achromatopsia resulted in significantly improved visual acuity and  
5 contrast sensitivity, thus validating CNG channels as a promising therapeutic target<sup>33</sup>.

6 Cryo-EM structural models of TAX-4<sup>34,35</sup>, human rod CNGA1 channels<sup>36</sup>, and prokaryotic  
7 homologs<sup>37,38</sup> in both unliganded and cGMP/cAMP-bound conformations provide important static  
8 snapshots of endpoints during ligand activation. These structures as well as others from  
9 prokaryotic homologs<sup>37,38</sup> are complimented by functional studies of channel currents and  
10 measures of ligand-dependent conformational changes using approaches such as fluorescence  
11 spectroscopy<sup>39</sup>, electron paramagnetic resonance<sup>40</sup>, and high-speed atomic force microscopy<sup>41</sup>.  
12 However, these studies do not by themselves reveal the sequence of events connecting the  
13 observed structural endpoints, which requires temporal resolution of distinct bound states that have  
14 previously not been directly observed.

15 Our observations provide a first look at individual CNBD dynamics and initial binding  
16 cooperativity in a full-length CNG channel embedded in native cell membrane. These results  
17 reveal similarity to individual site dynamics with structurally similar CNBDs from HCN channels  
18 and constrain plausible models of binding cooperativity. Our combined approach has broad  
19 application to other membrane receptors and complements structural information with dynamics  
20 for transient states whose structures are not easily resolved.

## 1 **Results**

### 2 **Immobilization of cell-derived nanovesicles for single-molecule imaging**

3 For imaging and immobilization, we fused the enhanced green fluorescent protein (EGFP)  
4 to the cytosolic N-terminus of the CNG channel TAX-4 (GFP-TAX-4). Cell-derived nanovesicles  
5 containing GFP-TAX-4 were generated as described for a study of nicotinic acetylcholine receptor  
6 stoichiometry<sup>7-9,42</sup> (Fig. 1). Briefly, HEK-293T cells transfected with GFP-TAX-4 were disrupted  
7 using nitrogen cavitation, resulting in the spontaneous formation of cell membrane vesicles with  
8 diameters around 200 nm<sup>9,42</sup> (Supplementary Fig. 1). The vesicles were further separated by  
9 gradient ultracentrifugation into fractions comprised primarily of either plasma membrane (PM)  
10 or endoplasmic reticulum (ER) membrane (Supplementary Fig. 2). The PM vesicle fraction was  
11 applied to a microfluidic chamber on a passivated glass coverslip with a GFP-nanobody bait  
12 protein sparsely deposited on its surface for on-chip purification and immobilization of GFP-TAX-  
13 4<sup>43,43,44</sup>. Due to the stochastic nature of vesicle assembly, a mixture of vesicles with either  
14 extracellular or intracellular leaflets exposed to the bath solution are obtained<sup>45</sup>. Vesicles  
15 containing GFP-TAX-4 oriented with both GFP and the intracellular CNBDs outside the vesicle  
16 are immobilized upon binding to the GFP-nanobody on the chip surface (Fig. 1), whereas vesicles  
17 without GFP-TAX-4 or with GFP and CNBDs oriented towards the inside of the vesicle are  
18 washed away upon rinsing with buffer (Supplementary Fig. 3a). To verify the applicability of this  
19 technique to proteins with more complex stoichiometries and extracellular binding domains such  
20 as reported for nAChRs<sup>8</sup>, we performed the same nanovesicle preparation and immobilization  
21 procedure with hetero-pentameric GABA<sub>A</sub> receptors comprised of  $\alpha_1$ ,  $\beta_2$  and  $\gamma_{2L}$  subunits  
22 (Supplementary Fig. 3b).

23

## 1 **Resolving individual binding events at TAX-4 CNG channels**

2 For optical detection of ligand binding events the sample chamber was continuously  
3 perfused with a fluorescent cGMP conjugate (fcGMP) previously shown to activate CNG channels  
4 with similar efficacy and affinity to cGMP<sup>22</sup>. Importantly, TIRF limits excitation laser power to  
5 an evanescent field within ~100-200 nm of the optical surface, encompassing primarily the layer  
6 of immobilized vesicles only. This is critical, as illumination of the vast majority of freely diffusing  
7 fcGMP above the vesicle layer would result in background fluorescence precluding resolution of  
8 individual fcGMP molecules. Because the time for free fcGMP to diffuse through a diffraction-  
9 limited spot (~1 ms) is appreciably shorter than the time resolution of our recordings (50 ms per  
10 frame), we did not resolve diffusion of fcGMP to or from TAX-4, but only observed increased  
11 fluorescence when fcGMP remained at a spot for a time period comparable to or longer than the  
12 frame duration, as when bound to TAX-4.

13 Colocalized spots with both EGFP and fcGMP fluorescence were identified as immobilized  
14 vesicles containing GFP-TAX-4 with functional binding domains (Fig. 2). To determine whether  
15 colocalized binding events represent specific binding to TAX-4 rather than nonspecific adsorption  
16 to the surface or lipids, we tested the ability of nonfluorescent cGMP to outcompete fcGMP for its  
17 binding site. Using a microfluidic pump and switch we perfused a mixture of fcGMP and an excess  
18 of nonfluorescent cGMP to outcompete fcGMP binding at the same molecules previously imaged  
19 in fcGMP alone. Colocalization of EGFP and fcGMP fluorescence, consistent with specific  
20 binding to immobilized GFP-TAX-4 receptors, was largely abolished by competition with  
21 nonfluorescent cGMP and recovered upon reapplication of fcGMP alone (Fig. 2). This suggests  
22 that reversible binding at these locations reflects fcGMP specific association with TAX-4 CNBDs.

1 We also observed fcGMP fluorescence at spots devoid of EGFP signal. The similar  
2 frequency of these noncolocalized spots upon competition with cGMP suggests that they reflect  
3 nonspecific adsorption of fcGMP (Fig. 2). To characterize noncolocalized signals, we compared  
4 the mean intensity and standard deviation of individual events to those at colocalized spots.  
5 Noncolocalized fcGMP events tend to have lower intensities and higher variance than colocalized  
6 events (Supplementary Fig. 4a). However, we occasionally observed noncolocalized high intensity  
7 events that we interpret as adsorption of fcGMP to the coverslip where the TIRF excitation field  
8 is most intense (Supplementary Fig. 4b-c). In this case, the lower intensity noncolocalized events  
9 are likely to reflect adsorption to aggregates in the surface layer. The high intensity events were  
10 generally much longer lived than the vast majority of binding events, suggesting that termination  
11 of most colocalized binding events can be attributed to unbinding rather than fluorophore  
12 bleaching. Noncolocalized EGFP spots were also observed, which we hypothesize reflect vesicles  
13 where surface interactions occlude solution access to CNBDs or otherwise render them  
14 nonfunctional. To verify that colocalized fcGMP fluorescence signals were not attributable to  
15 nonspecific interactions with nanovesicle lipids, we performed the same fcGMP binding  
16 experiment with immobilized nanovesicles containing either a TRPV1 channel fused to an  
17 intracellular GFP or GABA<sub>A</sub> receptors that do not bind cGMP. We did not observe any appreciable  
18 colocalization in the absence of GFP-TAX-4 (Supplementary Figs. 5-6). Taken together, these  
19 observations strongly suggest that colocalized EGFP and fcGMP fluorescence spots reflect specific  
20 binding of individual fcGMP molecules to the CNBDs of immobilized GFP-TAX-4 channels.

21 To restrict our analysis to colocalized spots containing single CNG channels we estimated  
22 the number of GFP-TAX-4 subunits in each diffraction-limited spot by counting the number of  
23 bleach steps in the EGFP fluorescence time series (Fig. 3a). Given that TAX-4 channels are



1 tetramers, we excluded from the analysis all spots with more than four bleach steps. The  
2 distribution of bleach steps for the remaining spots was well described by a binomial distribution  
3 for four sites with an estimated probability of observing each EGFP bleaching event of 0.82,  
4 consistent with reports for this probability (Fig. 3b)<sup>8,14</sup>. These spots were considered as having a  
5 high probability of containing single tetrameric GFP-TAX-4 channels.

6

### 7 **TAX-4 CNBDs undergo a conformational change following binding**

8 We measured a total of ~60 hours of SM binding dynamics across a range of fcGMP  
9 concentrations from 10-200 nM. Time series for fcGMP binding at these spots show a clear  
10 dependence on concentration as expected for binding events (Fig. 4a). At low concentrations of  
11 10-30 nM fcGMP we almost exclusively observed single isolated binding events. With increasing  
12 concentrations from 60-200 nM fcGMP we observed an increasing frequency of simultaneous  
13 binding of multiple fcGMP at individual molecules (i.e. stacked fluorescence steps). We did not  
14 explore higher fcGMP concentrations necessary to saturate the binding sites due to the challenge  
15 of increased background fluorescence from freely diffusing ligand.

16 Fluorescence time series for fcGMP binding were idealized to obtain the number of bound  
17 fcGMP at each time point (Fig. 4b; Supplementary Figs. 7-8; see Methods). The average bound  
18 probability across molecules exhibited a dependence on fcGMP concentration similar to  
19 observations of the cGMP concentration dependence of channel current<sup>46</sup> (Fig. 4d), further  
20 supporting the idea that our observations reflect binding events associated with activation of TAX-  
21 4. Furthermore, bound lifetimes were independent of concentration, whereas unbound lifetimes  
22 monotonically decreased with increasing fcGMP concentration as qualitatively expected for a  
23 binding reaction (Fig. 5a,c). For periods with simultaneous occupation of multiple sites, we

1 estimated the bound lifetime at each site by randomly assigning each unbinding event to one of  
2 the bound molecules. Repeating this random assignment led to nearly identical distributions,  
3 indicating that randomization did not severely distort the distributions. We assessed the ability of  
4 the idealization procedure to resolve individual events by applying it to simulated fluorescence  
5 binding data with lifetimes and noise drawn from the experimental observations (Supplementary  
6 Fig. 7). Comparison of the simulated and idealized event records indicates overall very good  
7 detection of singly and doubly liganded events except for brief single frame events in doubly  
8 liganded states which were missed approximately one third of the time (Supplementary Fig. 8; see  
9 Methods).

10 Bound lifetimes at all tested fcGMP concentrations were poorly described by a single  
11 exponential distribution indicative of unbinding from a singular bound state. Instead, at least two  
12 exponential components were needed to account for our observations (Fig. 5b; Supplementary  
13 Table 1), suggesting that the CNBDs adopt multiple bound conformations. To determine whether  
14 these different conformations arise from two distinct populations of molecules or reflect  
15 conformational exchange within a single population of molecules, we examined correlations  
16 between the lifetimes of successive binding events at individual molecules (Fig. 5d). If shorter and  
17 longer bound lifetimes were attributable to distinct populations of molecules, we would expect  
18 little correlation between short and long bound events within individual molecules. In this case we  
19 would expect to see primarily either short- or long-lived binding events at an individual molecule  
20 (i.e. lower left or upper right along the dashed diagonal line in Fig. 5d), and relatively fewer pairs  
21 of sequential short/long or long/short events (i.e. the off-diagonal in Fig. 5d). In contrast, we  
22 observe both short and long binding events at individual channels with high probability, suggesting  
23 that individual CNBDs exchange between at least two bound conformations. Unbound lifetime

1 distributions were also better described by two exponentials, suggesting that unliganded CNBDs  
2 also adopt at least two conformations. However, one of the two exponential components accounted  
3 for the majority of the unbound lifetime distributions, consistent with high frequency occurrence  
4 of a single unliganded conformation.

5 To explore the dynamics of this process at individual CNBDs we evaluated a series of  
6 hidden Markov models (HMMs) ranging from the simplest possible two state binding mechanism  
7 to models with up to two bound and unbound states (Supplementary Fig. 9). We restricted analysis  
8 of these models to isolated binding events by removing periods with two or more bound ligands,  
9 thereby splitting those time series into segments comprised only of singly bound events. Models  
10 were globally optimized in QuB<sup>47,48</sup> for all molecules and concentrations and ranked according to  
11 their relative Bayesian Information Criterion ( $\Delta\text{BIC} = \text{BIC} - \text{BIC}_{\text{best model}}$ ) scores (smaller is better)  
12 (Supplementary Fig. 9; Supplementary Table 2, see Methods). As expected, given the observed  
13 lifetime distributions, models with two bound states were preferred (smaller  $\Delta\text{BIC}$ ) over those with  
14 a single bound state. Addition of a second unbound state also reduced  $\Delta\text{BIC}$ , although to a lesser  
15 extent than addition of a second bound state. Both models with cyclic reaction schemes (M1.D and  
16 M1.F) resulted in much slower rate constants for one of the transition pairs, suggesting that a full  
17 cycle is traversed relatively infrequently. The best ranked model M1.F predicts that binding and  
18 unbinding following the conformational change is an order of magnitude slower than that  
19 preceding it (Supplementary Table 2). Furthermore, the  $\Delta\text{BIC}$  score for model M1.E which  
20 disallows binding/unbinding after the conformational change was almost equivalent to that of  
21 M1.F. Taken together, these observations suggest that binding following the conformational  
22 change is at least inhibited, and thus we favor a simplified sequential model that lacks these  
23 transitions. Our favored model M1.E (Fig. 6a; Supplementary Fig. 9) has the same form as the

1 model describing dynamics at individual isolated CNBDs from HCN2 channels<sup>49</sup>. Although M1.E  
2 predicts that the conformational change can occur in the absence of ligand, rates of exchange are  
3 much slower than those for ligand-bound sites (Supplementary Table 2). Thus, the relatively  
4 simpler model M1.B with only a single unbound state may also provide a reasonable simplified  
5 description of the data. In either case, the two best ranked models M1.E and M1.F as well as the  
6 simplified model M1.B all indicate that the CNBD undergoes a conformational change following  
7 binding, which we hypothesize involves capping of the binding pocket by the C helix as we  
8 previously proposed for HCN2 CNBDs<sup>49</sup> (Fig. 6a).

9

## 10 **The first two binding steps**

11 A fundamental limitation to fluorescence imaging is that background fluorescence and  
12 noise increase with increasing concentration of fluorescent dye. At micromolar concentrations of  
13 fcGMP, this background noise challenges identification of individual binding events. Thus, we  
14 limited our observations to concentrations that did not saturate the four binding sites in individual  
15 channels. Nonetheless, we were still able to resolve simultaneous ligand binding events as  
16 distinguished by multiple stepwise increases in fluorescence. At the highest concentration tested  
17 (200 nM) most events (99%) reflect 0, 1, or 2 bound ligands. We therefore restricted our analysis  
18 to only the first two binding steps by removing periods with more than two bound ligands from  
19 the binding time series, thereby splitting those records into segments. We explored the ability of  
20 several two-site HMM models to explain the observed binding dynamics across all molecules and  
21 concentrations and ranked them according to their relative  $\Delta$ BIC scores (Supplementary Fig. 10,  
22 Supplementary Table 3, see Methods). Note that subscripts on the model labels indicate different  
23 sets of constraints as described in Supplementary Fig. 10 and Supplementary Table 3.

1           The simplest models with two sequential binding steps only (M2.A<sub>i/c</sub>) are much less  
2 preferred than models with an additional conformational change in bound and/or unbound ligation  
3 states (M2.C<sub>i/c</sub>, M2.D, M2.E<sub>ii/ci/ic</sub>), irrespective of whether or not the binding sites were constrained  
4 to be independent (M2.A<sub>i</sub>) or allowed to be cooperative (M2.A<sub>c</sub>). We also examined a model with  
5 two distinct doubly liganded states (M2.B; e.g. adjacent and diagonally opposed occupied sites as  
6 depicted in Supplementary Fig. 10a) to assess whether distinct patterns of site occupation in the  
7 channel tetramer could explain our observations without requiring postulation of a conformational  
8 change independent of ligand association/dissociation. Model M2.B had a slightly better  $\Delta$ BIC  
9 score than models M2.A<sub>i/c</sub>, but the score for models including a non-binding conformational  
10 change were much better (Supplementary Fig. 10c). Together, these results suggests that multiple  
11 bound conformations for distinct ligation states is an important feature of cGMP association with  
12 TAX-4, consistent with our observations for dynamics at single sites.

13           To explore the nature of the postulated conformational exchange within each ligation  
14 condition we evaluated several models that treat this process as either a global exchange of both  
15 CNBDs (M2.C, M2.D) or separate exchanges within each individual CNBD (M2.E). To simplify  
16 the models, we did not consider the combination of distinct di-liganded orientations (e.g. M2.B)  
17 and conformational changes separate from ligand association/dissociation. Instead, we focused on  
18 the conformational change whose importance is suggested by both single site dynamics and the  
19 preference for models M2.C-E over M2.A-B. Simulated bound and unbound dwell time  
20 distributions for each optimized model describe our observed distributions well for all models that  
21 contain multiple bound conformations but differ substantially for models that lack this feature  
22 (Supplementary Fig. 11). The best ranked models were M2.C<sub>i/c</sub> and M2.D. Model M2.D describes  
23 a Monod-Wyman-Changeux (MWC) model where ligand affinity depends on the global

1 conformation and the equilibrium between conformations is influenced by the number of bound  
2 ligands. M2.C<sub>i/c</sub> differ from M2.D in that the binding sites are assumed to be accessible in only  
3 one conformation, similar to that observed for single sites. Although similarly ranked, optimized  
4 parameters for M2.D imply that each successive binding step slows the dynamics of the  
5 conformational exchange by roughly an order of magnitude and that association kinetics in the  
6 alternate conformation are likewise slowed. To explore whether a different set of parameters for  
7 M2.D might be equally likely we constrained binding following the conformational change to be  
8 no slower than binding preceding it, in which case the likelihood dropped such that it ranked worse  
9 than all other models with the exception of M2.A<sub>i/c</sub> (not shown). Given that both single site  
10 dynamics and M2.D suggest that binding is less favorable following the conformational change,  
11 we favor the simpler scheme M2.C where binding/unbinding is disallowed after the  
12 conformational change (Fig. 6b). M2.C further predicts that successive binding events bias the  
13 conformational equilibrium as qualitatively expected if the conformational exchange is part of the  
14 activation process. Scheme M2.C is also consistent with our hypothesis that the conformational  
15 change involves capping of the binding pocket by the C helix<sup>49</sup> (Fig. 6a), and further suggests that  
16 binding at one site induces capping of both CNBDs (possibly all four).

17 Scheme M2.E (Fig. 6c) differs from M2.C and M2.D in that rather than a global  
18 conformational exchange of both CNBDs, each CNBD can individually exchange between two  
19 bound conformations. Although the likelihood of models M2.E<sub>ii/ci/ic</sub> are slightly lower than that of  
20 models describing a global conformational change (i.e.  $\Delta$ BIC scores are slightly higher), it is not  
21 clear that this mechanism can be ruled out. Therefore, whether conformational exchange occurs  
22 separately for each CNBD or involves a global rearrangement of both/all CNBDs is uncertain.

1 Additional binding data for the third and fourth step will likely be needed to distinguish these  
2 possibilities.

3

#### 4 **Binding cooperativity**

5 The distribution of observed average probabilities for 0-4 bound ligands shifted to higher  
6 occupation states with increasing concentration. Across concentrations, the distribution was  
7 qualitatively described by a binomial distribution as expected for binding at four identical and  
8 independent sites (Fig. 4c). However, at higher concentrations the binomial fits tended to  
9 underestimate occupation probability, which could reflect cooperative interactions between  
10 binding sites (Fig. 4c). We compared models where the first and second binding steps were  
11 constrained to be independent (M2.C<sub>i</sub>, M2.E<sub>ii/ic</sub>) or allowed to be cooperative (M2.C<sub>c</sub>, M2.E<sub>ci</sub>) (see  
12 constraints in Supplementary Table 3). In all cases, removing the constraint for independent  
13 association at each site led to models predicting positive cooperativity for the binding equilibrium  
14 of the second ligand (Supplementary Table 3). However, cooperative effects on equilibrium  
15 constants were minor, with factors in the range 2.3-3.7. Also, the improvement in  $\Delta$ BIC score from  
16 allowing cooperative binding was uniformly minor in comparison to that for addition of a second  
17 bound conformation, global or otherwise. We also examined a model where the per-subunit  
18 conformational change was allowed to be cooperative (M2.E<sub>ic</sub>) with similar results.

19 To further explore cooperative binding and to verify our ability to resolve such effects, we  
20 compared our experimental data to simulations of independent binding sites (see Methods). For  
21 independent sites, the dwell time distribution for events starting upon binding the second ligand  
22 and ending upon unbinding of either of the bound ligands should be truncated as compared to the  
23 distribution of dwell times for singly bound receptors. This is because statistically the rate of

1 unbinding at either of two identical and independent sites should be twice that of a single site,  
2 thereby limiting the frequency of long-lived doubly bound durations compared to singly bound  
3 durations. Indeed, simulations of independent sites do predict fewer longer-lived periods with two  
4 bound ligands as opposed to one bound ligand, which we can resolve with our idealization  
5 procedure after adding noise analogous to our experimental recordings (Supplementary Fig.  
6 12a,b). In contrast, we do not observe a similar reduction in the frequency of longer-lived doubly  
7 bound events in our experimental fcGMP binding series (Supplementary Fig. 12c). It is difficult  
8 to rule out that such an effect might be present, but it appears to be at least reduced as compared  
9 to the simulated prediction for independent sites. The increased frequency of longer-lived doubly  
10 bound events in the data suggests that unbinding of the second ligand is slowed, which in the tested  
11 models results from a reduction in the unbinding rate and an increased probability for the CNBD  
12 to be in the exchanged conformation from which unbinding is infrequent (disallowed in the model).  
13 We also could be underestimating this effect given that the longest-lived events may be truncated  
14 by bleaching (Supplementary Fig. 14).

15         Similarly, we compared the latency to binding of the second ligand (2<sup>nd</sup> latency) after  
16 binding the first ligand in our experimental observations with predictions from simulations of  
17 independent sites. The distribution of 2<sup>nd</sup> latencies was shifted to shorter durations in the  
18 experimental fcGMP bound series as compared to simulations of independent sites, again  
19 suggesting that the binding rate for the second ligand is slightly faster than that of the first  
20 (Supplementary Fig. 13). The ratio for the mean 2<sup>nd</sup> latency of fcGMP binding data and  
21 independent simulations suggests that the second ligand binds 1.3-fold faster than predicted for  
22 independent sites, similar to predictions in the tested models. Taken together, the observed  
23 durations in distinct ligation states and the models both suggest that binding of the second ligand



- 1 is similar to the first, but that some potential positive cooperativity may confer a few fold increase
- 2 in the binding equilibria of the second ligand relative to the first.

## 1 **Discussion**

2           Although multicolor SM fluorescence has previously been used to resolve binding  
3 dynamics for soluble proteins or nucleotides<sup>50</sup>, similar measures for small molecule binding to  
4 membrane proteins in native lipids are few. For oligomeric proteins, the ability to resolve dynamics  
5 in distinct ligation states (i.e. singly- vs doubly-bound) is crucial for exploring the sequence of  
6 binding events and their cooperative interactions. Here, we introduce a combined approach using  
7 cell-derived nanovesicles, microfluidics and mmTIRF colocalization SM fluorescence  
8 spectroscopy to study single-receptor ligand binding in native lipids. Our approach has several  
9 advantages for SM measurements in membrane proteins: 1) Proteins are never removed from their  
10 cellular lipid environment. 2) Vesicles can contain the protein in both inward and outward facing  
11 orientations, providing access to either extracellular or intracellular receptor sites. 3) Microfluidic  
12 liquid handling enables within-experiment solution exchange to readily identify molecules  
13 exhibiting specific binding amidst background signals from nonspecific adsorption that challenge  
14 typical SM colocalization experiments at the dye concentrations used. 4) Expression and on-chip  
15 purification of full-length proteins for SM experiments requires only standard transfection of  
16 cultured cells as opposed to potentially costly and time-consuming searches for appropriate  
17 purification conditions in synthetic environments and stabilizing mutations. 5) Immobilization of  
18 proteins simplifies the observation of individual molecules over longer time periods to resolve  
19 dynamics. As an exemplar system, we applied this approach to study the first two cyclic nucleotide  
20 binding steps to full-length CNG TAX-4 channels. Our results suggest that binding is followed by  
21 a conformational change of the bound complex similar to that observed in isolated CNBDs from  
22 HCN2 channels. Furthermore, our observations provide an unprecedented view of the dynamics

1 of the first two binding events which place constraints on the degree of binding cooperativity  
2 between the first and second ligand.

3 The observed binding dynamics at individual CNBDs in TAX-4 are very similar to  
4 observations of fcAMP binding dynamics at isolated CNBDs from HCN2 channels<sup>49</sup>. Coupling  
5 these dynamics with structures of the apo and holo CNBD, we previously postulated a mechanism  
6 whereby cyclic nucleotide binding is followed by a conformational change of the CNBD involving  
7 capping of the binding pocket by the C helix, thereby hindering unbinding prior to uncapping<sup>49</sup>  
8 (Fig. 6a). Such a movement of the C helix is inferred from numerous structures of homologous  
9 CNBDs and also observed in functional CNBDs with Förster resonance energy transfer (FRET)<sup>51</sup>  
10 and double electron-electron resonance (DEER)<sup>52</sup>. This mechanism explains the lower frequency  
11 of binding/unbinding predicted to occur following the conformational change (e.g. compare  
12 models M1.E and M1.F in Supplementary Fig. 9). Given the similarity between our prior  
13 observations of purified CNBDs and our observations in this study of full-length TAX-4 channels,  
14 it is likely that similar intrinsic fluctuations of isolated CNBDs occur in the channel complex. A  
15 recent study arrives at a similar conclusion that a conformational change follows binding in full-  
16 length HCN1 and HCN2 channels<sup>53</sup>.

17 Cryo-EM structures of TAX-4 have recently been resolved in both unliganded and fully  
18 cGMP-bound states<sup>34-36</sup>. These structural snapshots are largely consistent with the above  
19 mechanism involving movement of the C helix towards the occupied binding pocket. In the full-  
20 length channel structures, binding is also associated with movement of the CNBDs towards the  
21 lipid membrane and rotation of the CNBDs about the pore axis resulting in an expansion of the  
22 pore lining S6 helices consistent with opening of the channel pore in response to ligand. Similar

1 movements were also observed for CNG channels with fluorescence<sup>39</sup>, DEER<sup>40</sup>, and high-speed  
2 atomic force microscopy<sup>41</sup>.

3         The most likely models explored here predict that the probability of the CNBDs to adopt  
4 their alternate conformation increases with successive binding of each of the first two ligands,  
5 suggesting that the conformational change is part of the ligand activation pathway. However, it is  
6 important to keep in mind that our observations don't include channel current, which challenges  
7 direct comparison with previous models of CNG channel pore gating. Nonetheless, the dynamics  
8 of the conformational change at the CNBDs is too slow to account for single channel observations  
9 of pore gating<sup>54</sup>, and thus we hypothesize that it reflects an earlier step in the activation process  
10 preceding opening of the pore gate. As such, changes in CNBD conformation would place the  
11 channel in a preactivated state from which bursts of channel openings could occur. CNBDs in  
12 mixtures of conformations could also underlie observed subconductances in channels covalently  
13 locked into distinct ligand-bound states<sup>55</sup>. We hypothesize that this conformational change  
14 involves capping of the CNBD by the C helix along with movement towards the membrane of the  
15 CNBD and C-linker connecting the CNBD to the pore lining S6 helix as observed in structural and  
16 functional studies<sup>34–36,39–41</sup>.

17         Although our observations of binding dynamics strongly support a conformational change  
18 in ligand-bound CNBDs, it is unclear whether this is a global change involving all subunits or  
19 independent exchange within individual CNBDs. Models describing both of these processes are  
20 difficult to distinguish with these data alone (**Fig. 6b,c**), and likely will require observations of the  
21 third and fourth binding steps to resolve. Nonetheless, the dynamics do suggest that  
22 binding/unbinding is unfavorable following the conformational change. In the case of a global  
23 conformational change, this would also inhibit association at unoccupied sites. Of interest is a

1 model that extends a simple MWC mechanism for ligand binding and pore opening<sup>56</sup> to postulate  
2 that the tetrameric channel behaves as a dimer of dimers<sup>57</sup>. However, given that we only observed  
3 the first two binding events, it is difficult to distinguish between channels functioning as tetramers  
4 or coupled dimers.

5 Combined simultaneous observations of fcGMP binding and channel current in  
6 macroscopic ensembles of CNGA2 channels previously led to a model with a structure similar to  
7 that shown in Fig. 6b, but where the transitions we associate with CNBD conformational exchange  
8 were associated with pore gating<sup>22</sup>. This model predicts strong negative cooperativity exclusively  
9 during binding of the second ligand and similarly strong positive cooperativity upon binding the  
10 third ligand, with a reduction/increase in binding equilibrium of over three orders of magnitude  
11 for the second/third binding steps, respectively. Our results rule out such strong cooperativity for  
12 the second binding step in TAX-4, rather indicating that binding of the second ligand may involve  
13 at most relatively weaker positive cooperativity. Either CNGA2 channels behave differently than  
14 TAX-4, or models with more modest cooperative effects<sup>58</sup> are more likely. We hypothesize that  
15 occlusion of individual binding events in distinct ligation states by ensemble averaging challenged  
16 unique identification of cooperative effects. Ultimately, additional experiments are needed to  
17 resolve the dynamics of the third and fourth binding steps, possibly with FRET between fcGMP  
18 and an acceptor label on the channel to retain SM resolution at higher fluorophore concentrations<sup>59</sup>.  
19 A recent study using similar single-molecule methods shows that cAMP binding is non-  
20 cooperative in HCN1 and HCN2 channels<sup>53</sup>. However, whereas CNG channels are directly gated  
21 by cGMP, HCN channels are gated primarily by voltage and modulated by cAMP. Thus, although  
22 our observations for TAX-4 are qualitatively similar to that for HCN1 and HCN2, positive

1 cooperativity for the second binding step may reflect ligand-induced pore opening in TAX-4,  
2 although this remains to be determined.

3         This study provides unprecedented observations of the dynamics of early binding events  
4 and a conformational change that precedes channel opening. Our observations complement static  
5 structural snapshots of fully unliganded and fully bound conformations by reporting on the  
6 dynamics of partially liganded conformations that lie on the reaction pathway between endpoints  
7 designated by recent cryo-EM structures. These data also exemplify how binding dynamics can be  
8 used to observe conformational exchanges that may otherwise be difficult to measure, either due  
9 to their transient nature, small structural motions, or because it is unclear where to place probes  
10 for more targeted measurements. Finally, our combined SM approach has broad application to any  
11 membrane protein where protein and/or ligand are amenable to fluorescent labeling.

## 1 **Methods**

### 2 **Constructs**

3 TAX-4 was a gift from Drs. Jonathan Pierce and Iku Mori. EGFP was appended to the N-  
4 terminus of TAX-4 (GFP-TAX-4) in the pUNIV vector as follows: A previous construct with an  
5 N-terminal EGFP in pUNIV containing an ApaI restriction site between EGFP and the gene and  
6 an MluI restriction site following the gene was used as a starting template. The previous gene was  
7 excised between ApaI and MluI sites, and TAX-4 was inserted using the same sites. This resulted  
8 in a two-residue linker (G-P) between EGFP and TAX-4. The entire gene was sequenced for  
9 verification.

10 The full-length rat GABA<sub>A</sub> receptor  $\alpha$ 1,  $\beta$ 2 and  $\gamma$ 2L subunits in the pUNIV vector were a  
11 gift from Dr. Cynthia Czajkowski. mScarlet (Addgene #99280) was inserted in the M3-M4 loop  
12 of the  $\alpha$ 1 subunit between residues V372 and K373 using an in-frame non-native AscI restriction  
13 site (GGGCGCGCC) introduced through site-directed mutagenesis as previously described<sup>60</sup>. This  
14 results in the insertion of an additional three residues (G-R-A) on each end of mScarlet. EGFP was  
15 similarly inserted in the N terminal region of the  $\beta$ 2 subunit between residues N4 and D5, again  
16 using an in-frame non-native AscI restriction site as described for mScarlet.

17

### 18 **Preparation of cell-derived nanovesicles**

19 HEK-293T cells were cultured at 37 °C and 5% CO<sub>2</sub> (Eppendorf). Cells were plated in  
20 60 mm dishes and transfected with 1 ug of GFP-TAX4 and 3 ug of PEI-MAX per dish. After 24  
21 hours, cells from four dishes were combined and vesicles were prepared as previously described<sup>9</sup>.  
22 Briefly, the cells were subject to nitrogen cavitation at 600 psi. for 20 minutes while suspended in  
23 3 mL of hypotonic protease inhibitor solution (in mM: 10 Tris-HCl, 10 NaCl, 1.5 MgCl<sub>2</sub>,

1 0.2 CaCl<sub>2</sub>, pH 7.4). One Pierce protease inhibitor tablet (ThermoScientific) was added per 10 ml  
2 of buffer. To separate plasma membrane vesicles from organelle membrane vesicles, the lysate  
3 was dispensed onto a gradient containing 60, 30, 20, and 10% solutions of OptiPrep, followed by  
4 ultracentrifugation at 112,000 x g for 90 min at 4 °C. Following centrifugation, the sample was  
5 fractionated into nine 1-1.5 mL fractions using a peristaltic pump, where the highest density  
6 fraction was collected first. OptiPrep was removed from fractions containing plasma membrane  
7 nanovesicles via centrifugation at 100,000 x g for 1 hour at 4 °C using a fixed angle rotor. The  
8 resulting pellet was resuspended in 250 µL of buffer for immobilization as described below.

9

#### 10 **Imaging fcGMP binding at TAX-4 channels in cell-derived nanovesicles**

11 Prior to immobilization, coverslip glass was UV-cleaned (Jelight) and passivated with a  
12 PEG monolayer sparsely doped with PEG-biotin (Laysan Bio) as previously described<sup>44,61</sup>. A  
13 50 µL microfluidic chamber (Grace Biolabs) was adhered to the passivated coverslip to allow for  
14 solution flow during imaging. The chamber was serially incubated in 10 mg/ml bovine serum  
15 albumin (BSA), 50 ug/ml streptavidin, and 1 ug/mL biotinylated GFP-nanobody (ChromoTek).  
16 All solutions were made in a buffer that consisted of phosphate buffered saline (PBS; pH 7.4)  
17 supplemented with 1 mM CaCl<sub>2</sub> and 1 mM MgCl<sub>2</sub>. Following each 10-15 minute incubation step,  
18 the chamber was washed with 4 ml of buffer to remove any non-immobilized components. Finally,  
19 the chamber was incubated with a preparation of nanovesicles from cells expressing GFP-TAX-4  
20 (i.e. protein of interest fused with GFP) for 10-15 minutes followed by washing with 4 ml of buffer.  
21 This resulted in sparse immobilization of vesicles containing GFP-TAX-4. The chamber was then  
22 connected to a microfluidic pump and switch (Elveflow) for perfusion and exchange of solutions  
23 containing various concentrations of 8-(2-[DY-547]-aminoethylthio) guanosine-3',5'- cyclic



1 monophosphate (fcGMP; BioLog) and cGMP in buffer. Solutions were continuously perfused at  
2 a constant flow rate of approximately one chamber volume per minute during imaging on an  
3 inverted mmTIRF microscope (Mad City Labs) under either 488 or 532 nm laser excitation  
4 (Coherent OBIS). Laser power at the sample was 20 W/cm<sup>2</sup> (488 nm) and 40 W/cm<sup>2</sup> (532 nm).  
5 Fluorescence emission from immobilized vesicles in response to mmTIRF excitation was recorded  
6 simultaneously for an ~100x100 μm field of view on a 512x512 EMCCD camera (Andor iXon) at  
7 a frame rate of 20 Hz (50 ms per frame). For each field of view, we initially determined the location  
8 of all immobilized vesicles by bleaching the EGFP emission from 500-550 nm under 488 nm  
9 excitation. Thereafter, binding of fcGMP in solution was monitored by recording emission from  
10 fcGMP within 560-950 nm under 532 nm excitation.

11

## 12 **Single-molecule fcGMP binding image analysis**

13 Time-averaged fluorescence for EGFP and fcGMP from the same field of view were  
14 overlaid to identify diffraction-limited spots containing GFP-TAX-4 that colocalized with fcGMP  
15 binding. For EGFP this average included only the first 20-50 frames prior to significant bleaching  
16 of the EGFP signal. The entire time series was averaged for fcGMP as unbleached fcGMP from  
17 the bath can continuously diffuse into the vesicle layer where binding is detected. Mechanical drift  
18 of the stage parallel to the imaging plane was subpixel during imaging even for tens of minutes or  
19 longer due to the high stability of the Mad City Labs mmTIRF stage. A small offset of up to a few  
20 pixels was sometimes observed between EGFP and fcGMP image sets due to mechanical  
21 perturbation from manual swapping of filters on the optical table. This offset was corrected for by  
22 registering images of the time-averaged fluorescence for EGFP and fcGMP recordings in  
23 MATLAB using an affine transform. Drift perpendicular to the image plane was continuously

1 autocorrected during imaging by a nano-positioning stage that adjusted the distance between the  
2 sample chamber and microscope objective to maintain the position of the mmTIRF excitation laser  
3 on a quadrant position detector downstream of the exit micromirror (Mad City Labs). For  
4 colocalized spots with both EGFP and fcGMP fluorescence, the average intensity within a five-  
5 pixel diameter circle centered on the spot was projected across each frame to obtain the  
6 fluorescence time series at that spot. Bleach steps for EGFP at each and every colocalized spot  
7 were manually evaluated to estimate the number of GFP-TAX-4 subunits in each spot and spots  
8 with more than four EGFP bleach steps consistent with multiple channels were excluded from  
9 analysis. The number of molecules at each concentration was: 10 nM: 112, 30 nM: 325, 60 nM:  
10 63, 100 nM: 65 and 200 nM: 132. In total, we recorded ~60 hours of single-molecule binding.

11 To assess the impact of photobleaching on the observed event durations we examined the  
12 lifetimes of noncolocalized fcGMP events that we assume largely reflect adsorption to the surface  
13 and subsequent bleaching. If some of these events are truncated by unbinding from the surface  
14 rather than bleaching, we will underestimate the actual bleach times. Given that these events were  
15 typically noisy, we manually estimated their lifetimes for a handful of randomly selected  
16 experiments. The mean bleach time across molecules was 23.4 seconds, an order of magnitude  
17 longer than the time constant for the longest duration bound component (Supplementary Fig. 14;  
18 Supplementary Table 1). This suggests that most binding events were terminated by unbinding  
19 rather than bleaching, although the lifetimes of the longest-lived bound events are likely to be  
20 slightly underestimated due to bleaching.

21

22 **Idealization of time series for number of fcGMP bound**

1           To extract time series for the number of bound fcGMP we first denoised fcGMP  
2 fluorescence time series using DISC<sup>62</sup>. A complication in interpreting these time series is that the  
3 fluorescence intensity for individual events was somewhat variable, challenging assignment of the  
4 number of bound ligands at each time point based solely on intensity. The distribution of individual  
5 event intensities is close to normally distributed with a slight skew toward higher intensities  
6 (Supplementary Fig. 7), suggesting that this variation reflects a random process rather than distinct  
7 numbers of bound ligands or discrete subpopulations of receptors. Such variation is typically  
8 observed in other colocalization fluorescence experiments. The source of this heterogeneity is  
9 uncertain but is likely caused by shifts of the molecule in the exponentially decaying excitation  
10 field or dye photodynamics<sup>63,64</sup>. To address overfitting due to fluctuation of individual event  
11 intensities, neighboring piecewise constant segments identified by DISC were recursively merged  
12 if the difference between their mean fluorescence was less than the weighted sum of the standard  
13 deviations of their fluorescence, where the weight for each segment was the ratio of the number of  
14 data points in the segment to the total number of data points in both segments. Single frame  
15 segments with intensities intermediate to their surrounding segments were visually identified as  
16 typically reflecting noise rather than discrete transition intermediates, and thus were merged into  
17 the neighboring segment with the most similar mean intensity. The denoised fluorescence time  
18 series was then constructed from the mean fluorescence within each discrete segment. The lowest  
19 intensity level identified by DISC was assumed to reflect the unliganded baseline, as even at the  
20 highest concentration tested periods of low fluorescence consistent with background were  
21 observed for all molecules. Any denoised segment containing any of these baseline data points  
22 was assigned a bound count of zero. For each contiguous block of remaining segments, the number  
23 of bound fcGMP was incremented or decremented based on whether the denoised intensity

1 increased or decreased. Binding/unbinding events whose denoised intensity change was more than  
2 double that of neighboring unbinding or binding events, respectively, were considered to involve  
3 binding or unbinding of two molecules of fcGMP within a single frame. Similarly, contiguous  
4 triplets of events that returned to within 100 au of their initial intensity were considered to include  
5 a single event for association or dissociation of two fcGMP within a single frame. In a few cases  
6 this procedure resulted in a bound count of less than one for a segment we previously identified as  
7 having a nonzero number of bound ligands, suggesting that we misidentified the number of fcGMP  
8 associated with a prior individual event. To correct for this, we recursively examined the chain of  
9 monotonic unbinding events preceding each segment with an erroneous bound count of zero. If  
10 this chain contained a segment with only a single frame, the two surrounding unbinding events  
11 were merged into a single unbinding event, otherwise the number of fcGMP associating during  
12 the binding event preceding this chain was incremented by one. This resulted in an idealized series  
13 for the number of bound fcGMP from 0-4 at each time point.

14 To assess the ability of the idealization procedure to resolve individual events, we applied  
15 it to simulated binding data at 30 or 200 nM ligand concentration whose lifetimes and noise were  
16 drawn from the experimental fluorescence observations (see below and Supplementary Fig. 7).  
17 Comparison of the known and idealized event records for simulated binding data indicates that the  
18 idealization procedure is incredibly accurate at identifying singly and doubly liganded events  
19 lasting two or more frames ( $\geq 100$  ms) but misses 36% brief single frame dwells in doubly  
20 liganded states (Supplementary Fig. 8). This is due to the additive noise from multiple fluorescent  
21 ligands coupled with a dwell time on the order of our sample duration and is much less of an issue  
22 for single frame events with only one occupied site (10% missed). Thus, brief single-frame  
23 intensity fluctuations following binding of one or more ligands that were identified as noise during

1 idealization (e.g. see couple of spikes around 15 seconds in Fig. 4b) could include missed brief  
2 events at higher ligation states. The algorithms overall accuracy, precision and recall was  
3 computed allowing for misidentification of the exact timing of individual events by up to four  
4 frames (accuracy = 0.83, precision = 0.95, recall = 0.87, F1-score = 0.91).

## 6 **Simulated fcGMP binding time series**

7 To simulate binding data resembling our experimental recordings, we used the idealized  
8 bound time series (see above) to extract baseline Gaussian noise and distributions of bound and  
9 unbound dwell times as well as isolated binding event intensities and their Gaussian fluctuations.  
10 To address periods with multiple bound ligands, we estimated individual site bound dwell times  
11 by randomly assigning each unbinding event to one of the bound ligands. Unbound dwell times  
12 for individual sites were assumed to be on average four times longer than were observed at  
13 tetrameric channels with four sites.

14 We first simulated single-site bound time series by randomly drawing from the single-site  
15 dwell time and event amplitude distributions described above, followed by the addition of  
16 Gaussian noise to individual event segments. Gaussian noise for individual events was assigned  
17 based on the observed linear correlation between event intensity and the standard deviation of  
18 within-event fluctuations for events with duration longer than 10 frames. No noise was added to  
19 the baseline at this point. To simulate tetramers comprised of independent CNBDs, we added four  
20 single-site time series together, and finally added Gaussian noise to the remaining baseline points  
21 based on the average standard deviation of baseline fluctuations in our data. This procedure sums  
22 the noise from each bound ligand without quadrupling the baseline noise. In total, we simulated

1 ~60 hours of binding data at multiple fcGMP concentrations to obtain a simulated dataset similar  
2 in size to our experimental dataset.

3

#### 4 **HMM Analysis**

5 All models were optimized in QuB<sup>47,48</sup> to maximize their likelihood for ~60 hours of  
6 idealized binding events across all molecules and concentrations. For single-site models  
7 (Supplementary Fig. 9) we restricted our analysis to isolated binding events by removing periods  
8 with two or more bound ligands, thereby splitting those time series into segments comprised only  
9 of singly bound events. For models of the first and second binding steps (Supplementary Fig. 10),  
10 we similarly restricted our analysis to periods with up to two occupied sites by removing bound  
11 periods with more than two bound ligands. Dead time in all cases was one frame. Optimized rate  
12 constants and their estimated uncertainty are given in Supplementary Tables 2 and 3. The models  
13 were ranked according to their relative Bayesian Information Criterion ( $\Delta\text{BIC} = \text{BIC} - \text{BIC}_{\text{best}}$   
14 <sub>model</sub>) scores (smaller is better) (Supplementary Figs. 9-10; Supplementary Tables 2-3).

15

#### 16 **Data availability**

17 The time series data that support the findings of this study are available as supplementary  
18 material. Additional data such as original image series are available from the authors upon request.

19

#### 20 **Code availability**

21 Data analysis was performed using custom-written scripts in MATLAB available as  
22 supplementary material and at [https://github.com/marcel-goldschen-ohm/single-molecule-](https://github.com/marcel-goldschen-ohm/single-molecule-imaging-toolbox)  
23 [imaging-toolbox](https://github.com/marcel-goldschen-ohm/single-molecule-imaging-toolbox).

1

## 2 **Acknowledgements**

3           We thank Drs. Jonathan Pierce and Iku Mori for gifting cDNA for wild-type TAX-4. We  
4 thank Drs. Richard Aldrich and Eric Senning for helpful discussion and shared use of equipment  
5 and Dr. Eric Senning for gifting the TRPV1-GFP construct.

6

## 7 **Author Contributions**

8           V.R.P. performed molecular biology including generating cDNA for constructs, carried out  
9 the experiment, analyzed the data and contributed to writing of the manuscript. A.M.S. and D.Q.  
10 contributed to data analysis and writing of the manuscript. S.G. performed molecular biology  
11 including generating cDNA for constructs as well as all cell culture for experiments. D.J.S.  
12 performed preliminary vesicle experiments. M.P.G. conceived, designed and oversaw the project  
13 and contributed to data analysis and writing of the manuscript.

## 1   **References**

- 2
- 3   1. Bakheet, T. M. & Doig, A. J. Properties and identification of human protein drug targets. *Bioinformatics*
- 4       **25**, 451–457 (2009).
- 5   2. Santos, R. *et al.* A comprehensive map of molecular drug targets. *Nat. Rev. Drug Discov.* **16**, 19–34
- 6       (2017).
- 7   3. Bahar, I., Lezon, T. R., Bakan, A. & Shrivastava, I. H. Normal Mode Analysis of Biomolecular Structures:
- 8       Functional Mechanisms of Membrane Proteins. *Chem. Rev.* **110**, 1463–1497 (2010).
- 9   4. Pollock, N. L., Lee, S. C., Patel, J. H., Gulamhussein, A. A. & Rothnie, A. J. Structure and function of
- 10       membrane proteins encapsulated in a polymer-bound lipid bilayer. *Biochim. Biophys. Acta BBA -*
- 11       *Biomembr.* **1860**, 809–817 (2018).
- 12   5. Seddon, A. M., Curnow, P. & Booth, P. J. Membrane proteins, lipids and detergents: not just a soap
- 13       opera. *Biochim. Biophys. Acta BBA - Biomembr.* **1666**, 105–117 (2004).
- 14   6. Zoonens, M. & Miroux, B. Expression of Membrane Proteins at the Escherichia coli Membrane for
- 15       Structural Studies. in *Heterologous Expression of Membrane Proteins: Methods and Protocols* (ed.
- 16       Mus-Veteau, I.) 49–66 (Humana Press, 2010). doi:10.1007/978-1-60761-344-2\_4.
- 17   7. Moonschi, F. H. *et al.* Cell-Derived Vesicles for Single-Molecule Imaging of Membrane Proteins. *Angew.*
- 18       *Chem. Int. Ed.* **54**, 481–484 (2015).
- 19   8. Fox-Loe, A. M., Moonschi, F. H. & Richards, C. I. Organelle-specific single-molecule imaging of  $\alpha 4\beta 2$
- 20       nicotinic receptors reveals the effect of nicotine on receptor assembly and cell-surface trafficking. *J.*
- 21       *Biol. Chem.* **292**, 21159–21169 (2017).
- 22   9. Moonschi, F., Fox-Loe, A., Fu, X. & Richards, C. Mammalian Cell-derived Vesicles for the Isolation of
- 23       Organelle Specific Transmembrane Proteins to Conduct Single Molecule Studies. *BIO-Protoc.* **8**,
- 24       (2018).



- 1 10. Larson, J. *et al.* Design and Construction of a Multi-wavelength, Micromirror Total Internal Reflectance  
2 Fluorescence Microscope. *Nat. Protoc.* **9**, 2317–2328 (2014).
- 3 11. Friedman, L. J., Chung, J. & Gelles, J. Viewing Dynamic Assembly of Molecular Complexes by Multi-  
4 Wavelength Single-Molecule Fluorescence. *Biophys. J.* **91**, 1023–1031 (2006).
- 5 12. Zeno, W. F. *et al.* Molecular Mechanisms of Membrane Curvature Sensing by a Disordered Protein. *J.*  
6 *Am. Chem. Soc.* **141**, 10361–10371 (2019).
- 7 13. Simonson, P. D. *et al.* Counting bungarotoxin binding sites of nicotinic acetylcholine receptors in  
8 mammalian cells with high signal/noise ratios. *Biophys. J.* **99**, L81–L83 (2010).
- 9 14. Ulbrich, M. H. & Isacoff, E. Y. Subunit counting in membrane-bound proteins. *Nat. Methods* **4**, 319–  
10 321 (2007).
- 11 15. Sako, Y., Minoghchi, S. & Yanagida, T. Single-molecule imaging of EGFR signalling on the surface of  
12 living cells. *Nat. Cell Biol.* **2**, 168–172 (2000).
- 13 16. Thillaiappan, N. B., Chavda, A. P., Tovey, S. C., Prole, D. L. & Taylor, C. W. Ca<sup>2+</sup> signals initiate at  
14 immobile IP<sub>3</sub> receptors adjacent to ER-plasma membrane junctions. *Nat. Commun.* **8**, 1505 (2017).
- 15 17. Sako, Y. & Uyemura, T. Total internal reflection fluorescence microscopy for single-molecule imaging  
16 in living cells. *Cell Struct. Funct.* **27**, 357–365 (2002).
- 17 18. Fernandes, C. C., Berg, D. K. & Gómez-Varela, D. Lateral mobility of nicotinic acetylcholine receptors  
18 on neurons is determined by receptor composition, local domain, and cell type. *J. Neurosci.* **30**, 8841–  
19 8851 (2010).
- 20 19. Schmauder, R., Kosanic, D., Hovius, R. & Vogel, H. Correlated Optical and Electrical Single-Molecule  
21 Measurements Reveal Conformational Diffusion from Ligand Binding to Channel Gating in the  
22 Nicotinic Acetylcholine Receptor. *ChemBioChem* **12**, 2431–2434 (2011).

- 1 20. Bertheleme, N., Singh, S., Dowell, S. J., Hubbard, J. & Byrne, B. Loss of constitutive activity is correlated  
2 with increased thermostability of the human adenosine A2A receptor. *Br. J. Pharmacol.* **169**, 988–998  
3 (2013).
- 4 21. Frey, L., Lakomek, N.-A., Riek, R. & Bibow, S. Micelles, Bicelles, and Nanodiscs: Comparing the Impact  
5 of Membrane Mimetics on Membrane Protein Backbone Dynamics. *Angew. Chem. Int. Ed.* **56**, 380–  
6 383 (2017).
- 7 22. Biskup, C. *et al.* Relating ligand binding to activation gating in CNGA2 channels. *Nature* **446**, 440–443  
8 (2007).
- 9 23. Otte, M. *et al.* Novel Fluorescent Cyclic Nucleotide Derivatives to Study CNG and HCN Channel  
10 Function. *Biophys. J.* **116**, 2411–2422 (2019).
- 11 24. Biel, M. & Michalakis, S. Cyclic nucleotide-gated channels. *Handb. Exp. Pharmacol.* 111–136 (2009)  
12 doi:10.1007/978-3-540-68964-5\_7.
- 13 25. James, Z. M. & Zagotta, W. N. Structural insights into the mechanisms of CNBD channel function. *J.*  
14 *Gen. Physiol.* **150**, 225–244 (2018).
- 15 26. Michalakis, S., Becirovic, E. & Biel, M. Retinal Cyclic Nucleotide-Gated Channels: From  
16 Pathophysiology to Therapy. *Int. J. Mol. Sci.* **19**, (2018).
- 17 27. Nishiguchi, K. M., Sandberg, M. A., Gorji, N., Berson, E. L. & Dryja, T. P. Cone cGMP-gated channel  
18 mutations and clinical findings in patients with achromatopsia, macular degeneration, and other  
19 hereditary cone diseases. *Hum. Mutat.* **25**, 248–258 (2005).
- 20 28. Patel, K. A. *et al.* Transmembrane S1 mutations in CNGA3 from achromatopsia 2 patients cause loss  
21 of function and impaired cellular trafficking of the cone CNG channel. *Invest. Ophthalmol. Vis. Sci.* **46**,  
22 2282–2290 (2005).
- 23 29. Wissinger, B. *et al.* CNGA3 Mutations in Hereditary Cone Photoreceptor Disorders. *Am. J. Hum. Genet.*  
24 **69**, 722–737 (2001).

- 1 30. Trudeau, M. C. & Zagotta, W. N. An Intersubunit Interaction Regulates Trafficking of Rod Cyclic  
2 Nucleotide-Gated Channels and Is Disrupted in an Inherited Form of Blindness. *Neuron* **34**, 197–207  
3 (2002).
- 4 31. Michaelides, M. *et al.* Progressive Cone Dystrophy Associated with Mutation in CNGB3. *Invest.*  
5 *Ophthalmol. Vis. Sci.* **45**, 1975–1982 (2004).
- 6 32. Sailani, M. R. *et al.* Isolated Congenital Anosmia and CNGA2 Mutation. *Sci. Rep.* **7**, 2667 (2017).
- 7 33. Fischer, M. D. *et al.* Safety and Vision Outcomes of Subretinal Gene Therapy Targeting Cone  
8 Photoreceptors in Achromatopsia: A Nonrandomized Controlled Trial. *JAMA Ophthalmol.* **138**, 643–  
9 651 (2020).
- 10 34. Li, M. *et al.* Structure of a eukaryotic cyclic-nucleotide-gated channel. *Nature* **542**, 60–65 (2017).
- 11 35. Zheng, X. *et al.* Mechanism of ligand activation of a eukaryotic cyclic nucleotide-gated channel. *Nat.*  
12 *Struct. Mol. Biol.* **27**, 625–634 (2020).
- 13 36. Xue, J., Han, Y., Zeng, W., Wang, Y. & Jiang, Y. Structural mechanisms of gating and selectivity of  
14 human rod CNGA1 channel. *Neuron* **109**, 1302–1313 (2021).
- 15 37. James, Z. M. *et al.* CryoEM structure of a prokaryotic cyclic nucleotide-gated ion channel. *Proc. Natl.*  
16 *Acad. Sci.* **114**, 4430–4435 (2017).
- 17 38. Rheinberger, J., Gao, X., Schmidpeter, P. A. & Nimigean, C. M. Ligand discrimination and gating in  
18 cyclic nucleotide-gated ion channels from apo and partial agonist-bound cryo-EM structures. *eLife* **7**,  
19 (2018).
- 20 39. Aman, T. K., Gordon, S. E. & Zagotta, W. N. Regulation of CNGA1 Channel Gating by Interactions with  
21 the Membrane. *J. Biol. Chem.* **291**, 9939–9947 (2016).
- 22 40. Evans, E. G. B., Morgan, J. L. W., DiMaio, F., Zagotta, W. N. & Stoll, S. Allosteric conformational change  
23 of a cyclic nucleotide-gated ion channel revealed by DEER spectroscopy. *Proc. Natl. Acad. Sci. U. S. A.*  
24 **117**, 10839–10847 (2020).

- 1 41. Marchesi, A. *et al.* An iris diaphragm mechanism to gate a cyclic nucleotide-gated ion channel. *Nat.*  
2 *Commun.* **9**, 3978 (2018).
- 3 42. Simpson, R. J. Disruption of Cultured Cells by Nitrogen Cavitation. *Cold Spring Harb. Protoc.* **2010**,  
4 [pdb.prot5513](#) (2010).
- 5 43. Jain, A., Liu, R., Xiang, Y. K. & Ha, T. Single-molecule pull-down for studying protein interactions. *Nat.*  
6 *Protoc.* **7**, 445–452 (2012).
- 7 44. Chandradoss, S. D. *et al.* Surface Passivation for Single-molecule Protein Studies. *J. Vis. Exp. JoVE*  
8 (2014) doi:10.3791/50549.
- 9 45. Huang, C., Quinn, D., Sadovsky, Y., Suresh, S. & Hsia, K. J. Formation and size distribution of self-  
10 assembled vesicles. *Proc. Natl. Acad. Sci. U. S. A.* **114**, 2910–2915 (2017).
- 11 46. Komatsu, H. *et al.* Functional reconstitution of a heteromeric cyclic nucleotide-gated channel of  
12 *Caenorhabditis elegans* in cultured cells. *Brain Res.* **821**, 160–168 (1999).
- 13 47. Qin, F., Auerbach, A. & Sachs, F. A Direct Optimization Approach to Hidden Markov Modeling for  
14 Single Channel Kinetics. *Biophys. J.* **79**, 1915–1927 (2000).
- 15 48. Nicolai, C. & Sachs, F. SOLVING ION CHANNEL KINETICS WITH THE QuB SOFTWARE. *Biophys. Rev. Lett.*  
16 **08**, 191–211 (2013).
- 17 49. Goldschen-Ohm, M. P. *et al.* Structure and dynamics underlying elementary ligand binding events in  
18 human pacemaking channels. *eLife* **5**, e20797 (2016).
- 19 50. Chen, J. *et al.* High-throughput platform for real-time monitoring of biological processes by multicolor  
20 single-molecule fluorescence. *Proc. Natl. Acad. Sci.* **111**, 664–669 (2014).
- 21 51. Taraska, J. W., Puljung, M. C., Olivier, N. B., Flynn, G. E. & Zagotta, W. N. Mapping the structure and  
22 conformational movements of proteins with transition metal ion FRET. *Nat. Methods* **6**, 532–537  
23 (2009).

- 1 52. DeBerg, H. A., Brzovic, P. S., Flynn, G. E., Zagotta, W. N. & Stoll, S. Structure and Energetics of Allosteric  
2 Regulation of HCN2 Ion Channels by Cyclic Nucleotides. *J. Biol. Chem.* **291**, 371–381 (2016).
- 3 53. White, D. S. *et al.* cAMP binding to closed pacemaker ion channels is non-cooperative. *Nature* (2021)  
4 doi:10.1038/s41586-021-03686-x.
- 5 54. Thompson, S. H. Cyclic GMP-gated channels in a sympathetic neuron cell line. *J. Gen. Physiol.* **110**,  
6 155–164 (1997).
- 7 55. Ruiz, M. L. & Karpen, J. W. Single cyclic nucleotide-gated channels locked in different ligand-bound  
8 states. *Nature* **389**, 389–392 (1997).
- 9 56. Richards, M. J. & Gordon, S. E. Cooperativity and cooperation in cyclic nucleotide-gated ion channels.  
10 *Biochemistry* **39**, 14003–14011 (2000).
- 11 57. Liu, D. T., Tibbs, G. R., Paoletti, P. & Siegelbaum, S. A. Constraining ligand-binding site stoichiometry  
12 suggests that a cyclic nucleotide-gated channel is composed of two functional dimers. *Neuron* **21**,  
13 235–248 (1998).
- 14 58. Wongsamitkul, N. *et al.* Quantifying the cooperative subunit action in a multimeric membrane  
15 receptor. *Sci. Rep.* **6**, 20974 (2016).
- 16 59. Goldschen-Ohm, M. P., White, D. S., Klenchin, V. A., Chanda, B. & Goldsmith, R. H. Observing Single-  
17 Molecule Dynamics at Millimolar Concentrations. *Angew. Chem. Int. Ed Engl.* **56**, 2399–2402 (2017).
- 18 60. Claxton, D. P. & Gouaux, E. Expression and purification of a functional heteromeric GABAA receptor  
19 for structural studies. *PLoS One* **13**, e0201210 (2018).
- 20 61. Joo, C. & Ha, T. Preparing sample chambers for single-molecule FRET. *Cold Spring Harb. Protoc.* **2012**,  
21 1104–1108 (2012).
- 22 62. White, D. S., Goldschen-Ohm, M. P., Goldsmith, R. H. & Chanda, B. Top-down machine learning  
23 approach for high-throughput single-molecule analysis. *eLife* **9**, e53357 (2020).

- 1 63. Dempsey, G. T. *et al.* Photoswitching Mechanism of Cyanine Dyes. *J. Am. Chem. Soc.* **131**, 18192–  
2 18193 (2009).
- 3 64. Stennett, E. M. S., Ciuba, M. A., Lin, S. & Levitus, M. Demystifying PIFE: The Photophysics Behind the  
4 Protein-Induced Fluorescence Enhancement Phenomenon in Cy3. *J. Phys. Chem. Lett.* **6**, 1819–1823  
5 (2015).
- 6

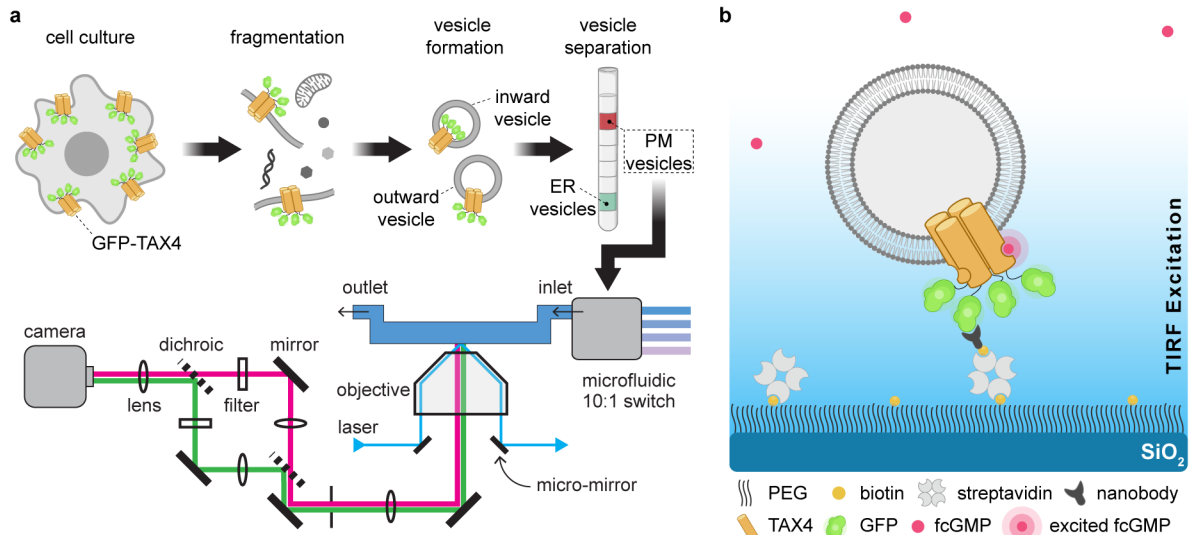

1 **Fig. 1 Immobilization of cell-derived nanovesicles for single-molecule imaging of membrane**  
2 **proteins.** a Schematic illustrating both sample preparation and the imaging setup. Briefly, cells  
3 expressing the membrane protein of interest (e.g. GFP-TAX-4) are fragmented using N<sub>2</sub> cavitation  
4 to spontaneously form nanoscale vesicles, some of which contain the protein of interest in a  
5 mixture of inward and outward facing orientations. Vesicles comprised of membrane from either  
6 the plasma membrane (PM) or endoplasmic reticulum (ER) are further separated by gradient  
7 ultracentrifugation. The fraction of PM vesicles is applied to a sample chamber for immobilization  
8 and imaging with micro-mirror total internal reflection (mmTIRF) microscopy. b Illustration of an  
9 individual immobilized vesicle in the sample chamber. The chamber consists of a glass coverslip  
10 coated with a layer of PEG doped with PEG-biotin to which a biotinylated anti-GFP nanobody  
11 (bait protein) is attached via streptavidin. Vesicles containing GFP-TAX-4 oriented such that GFP  
12 is exposed to the extravesicular solution are immobilized at nanobody locations on the optical  
13 surface. TIRF excitation, indicated by the blue gradient, ensures that bulk freely diffusing  
14 fluorescent ligand (e.g. fcGMP) above the vesicle layer are not appreciably excited. Fluorescence  
15 from the vesicle layer is imaged on an EMCCD as depicted to the left. Note that the vesicle is not  
16 drawn to scale as it would on average have a diameter about 20-fold larger than GFP-TAX-4.

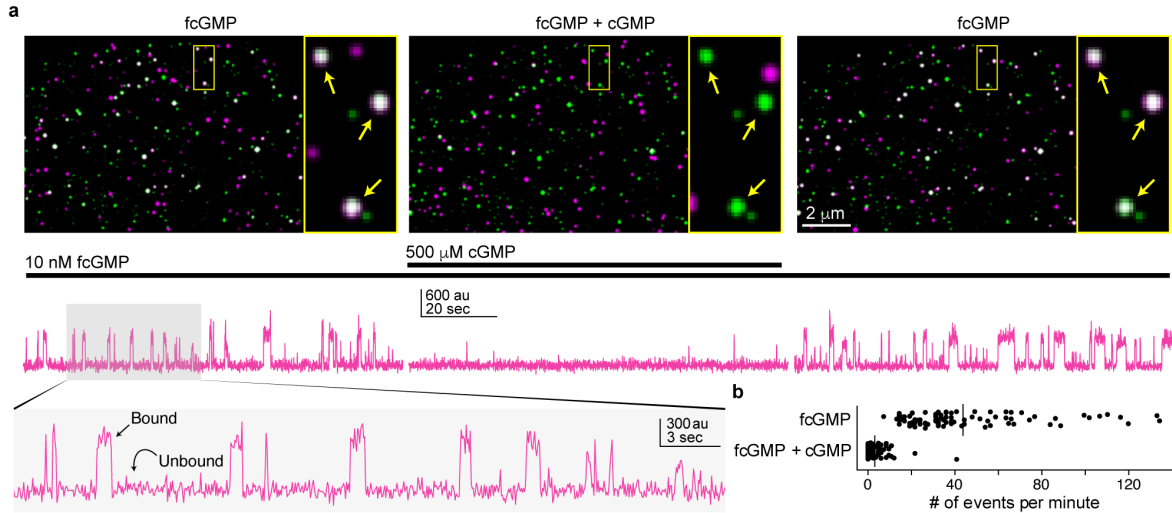

1 **Fig. 2 Single-molecule imaging of fcGMP binding to GFP-TAX-4 in cell-derived**  
2 **nanovesicles. a** Time-averaged fluorescence for GFP (green) overlaid with fcGMP (magenta).  
3 Colocalized GFP and fcGMP signals appear white. From left to right depicts sequential epochs for  
4 the same field of view showing binding in 10 nM fcGMP, block of specific binding by  
5 coapplication with an excess of 500 μM non-fluorescent cGMP, and recovery upon removal of  
6 cGMP. The yellow box is expanded to the right of each image and arrows indicate locations  
7 exhibiting specific fcGMP binding to GFP-TAX-4. Below each image are time series for fcGMP  
8 fluorescence at a single colocalized spot during each of the epochs in the corresponding images  
9 above. Transient increases in fluorescence reflect individual fcGMP binding events in the vesicle  
10 layer at the optical surface. The shaded region is expanded below. **b** The frequency of binding  
11 events in 10 nM fcGMP is greatly diminished in the presence of 500 μM competing non-  
12 fluorescent cGMP.



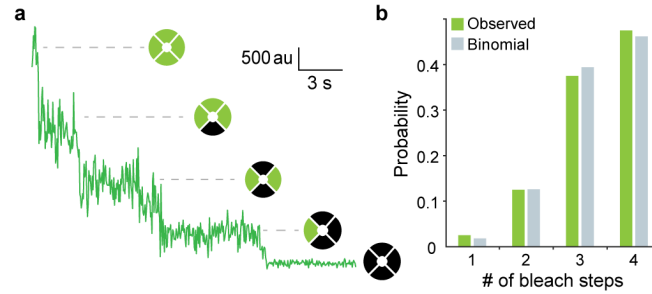

1 **Fig. 3 Number of GFP-TAX-4 subunits per vesicle assessed by photobleaching of GFP.**

2 **a** Stepwise photobleaching of GFP fluorescence from a single diffraction-limited spot. **b** The

3 number of observed bleach steps for colocalized spots included in the analysis. The good fit to a

4 binomial distribution with four sites suggests that most spots contain a single tetrameric channel

5 where bleaching of each GFP is observed with a probability of 0.82 and 95% CI [0.74, 0.89].

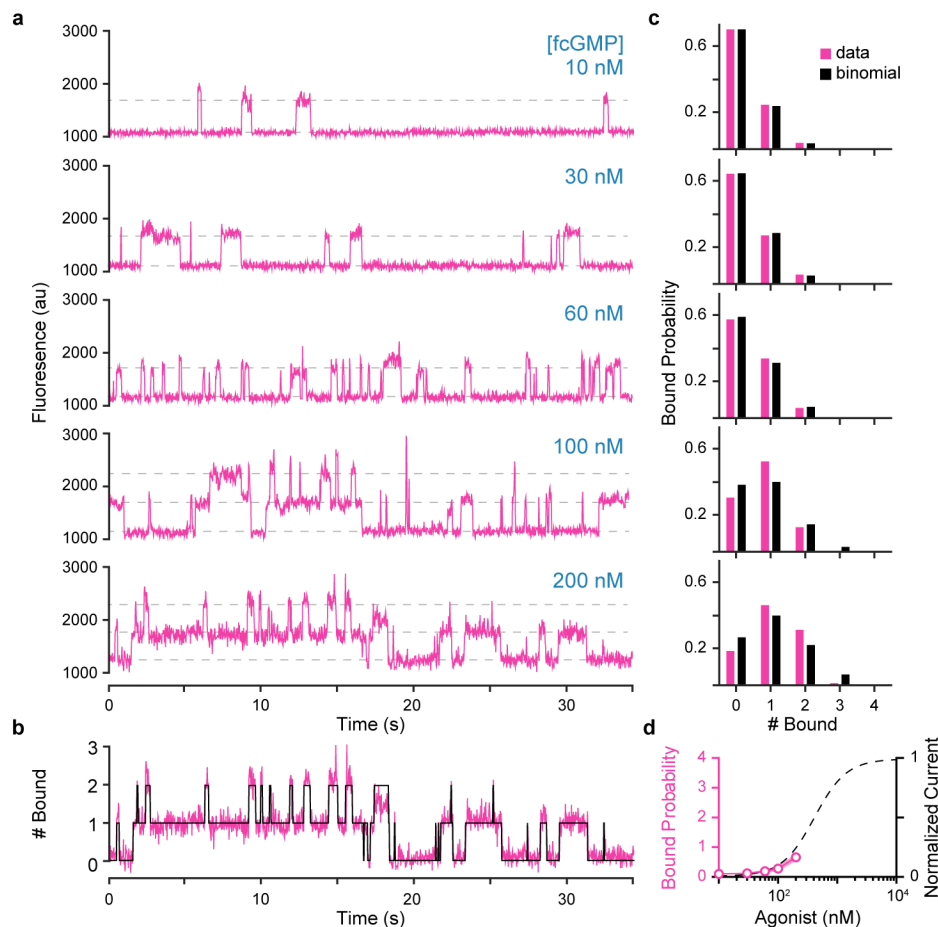

1 **Fig. 4 Concentration-dependent fcGMP binding.** **a** Time series for fcGMP binding to single  
2 TAX-4 containing nanovesicles at increasing concentrations of fcGMP. Horizontal dashed lines  
3 indicate approximate fluorescence levels reflecting stepwise binding of one or two fcGMP  
4 molecules. **b** Idealization (black) of fluorescence (magenta) time series for the number of bound  
5 fcGMP at an individual molecule in 200 nM fcGMP (see Methods). **c** Bound probability  
6 distributions for all tested concentrations and fits to a binomial distribution assuming four identical  
7 and independent sites. Bound probability [95% CI] per site from the binomial fits: 10 nM = 0.08  
8 [0.079, 0.081], 30 nM = 0.10 [0.09, 0.11], 60 nM = 0.12 [0.10, 0.14], 100 nM = 0.21 [0.20, 0.22],  
9 200 nM = 0.26 [0.24, 0.28]. **d** Average fcGMP bound probability across all molecules and  
10 normalized ionic current<sup>46</sup> as a function of fcGMP or cGMP concentration, respectively. Shaded

- 1 area represents SEM (partially hidden by the line width). Current values are for fits of the Hill
- 2 equation to inside-out patch clamp recordings in Komatsu et al. (1999)<sup>46</sup>.

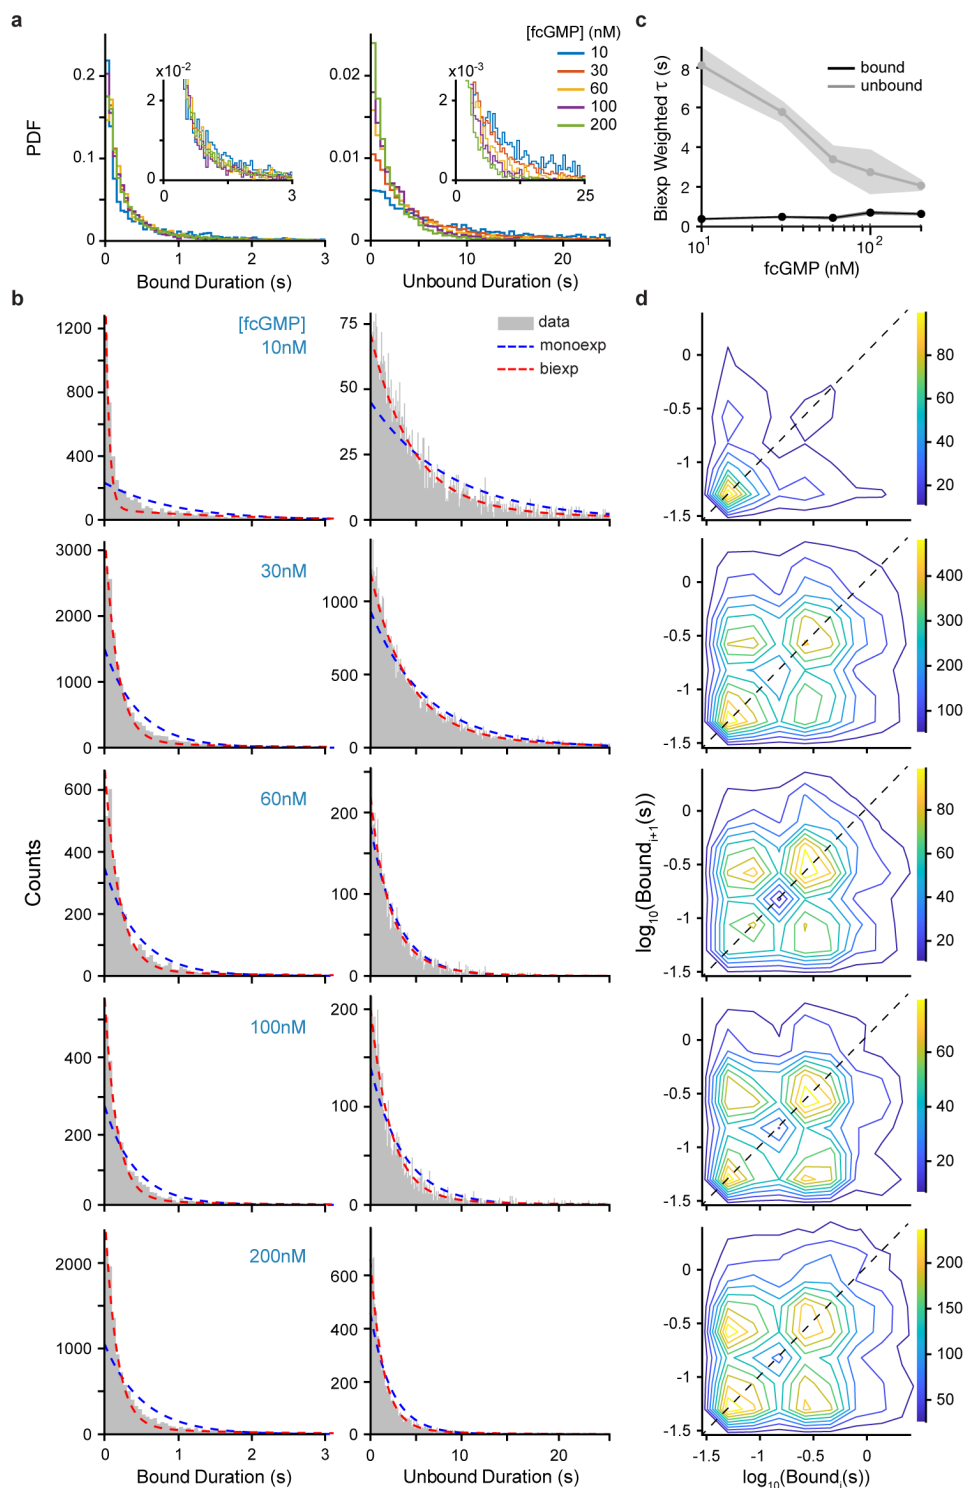

1 **Fig. 5 Bound and unbound dwell time distributions and correlations.** a Bound and unbound  
 2 fcGMP dwell time distributions across all molecules from idealized records (see Methods).  
 3 b Dwell time distributions for data (gray) overlaid with mono- (blue dashed) and bi-exponential

1 (red dashed) maximum likelihood fits (see Supplementary Table 1). **c** Weighted time constants  
2 from biexponential fits of bound (black) and unbound (gray) dwell times as a function of fcGMP  
3 concentration with associated 95% confidence intervals (shaded area). **d** Correlation between the  
4 duration of sequential singly bound events  $i$  and  $i+1$  within individual molecules. The  
5 concentration of fcGMP is the same as for the dwell time distributions to the left. Color bar denotes  
6 number of events. If short and long events arise from distinct populations of molecules, we would  
7 expect to observe clusters of events primarily along the dashed diagonal, whereas events on the  
8 off-diagonal represent sequential short and long bound durations within individual molecules.

1 **Fig. 6 Models for the first and second binding**

2 **steps. a** The preferred model for binding

3 dynamics at individual CNBDs. This model

4 depicts both a ligand association step (horizontal

5 transition) as well as a conformational change of

6 the CNBD in both unliganded and liganded states

7 (vertical transitions). The dashed arrows indicate

8 transitions that have a relatively smaller

9 contribution to the observed dynamics. Postulated

10 structures for the ligand-bound conformations are

11 shown to the right. They are based on cryo-EM

12 structures of TAX-4 in cGMP-bound (green) or

13 unliganded (blue) conformations<sup>34,35</sup>, where

14 cGMP has been added to the unliganded structure

15 in the position that it is found in the bound

16 structure, and arrows denote the observed

17 movement of the C helix between the two

18 structures. Capping of the binding site by the C

19 helix limits binding and unbinding, similar to

20 dynamics observed at isolated CNBDs from

21 HCN2 channels<sup>49</sup>. See Supplementary Fig. 9 and Supplementary Table 2 for all explored models

22 of individual CNBDs and their optimized rate constants. **b-c** Two potential models depicting

23 binding of the first two ligands and either a global conformational change of all four CNBDs in

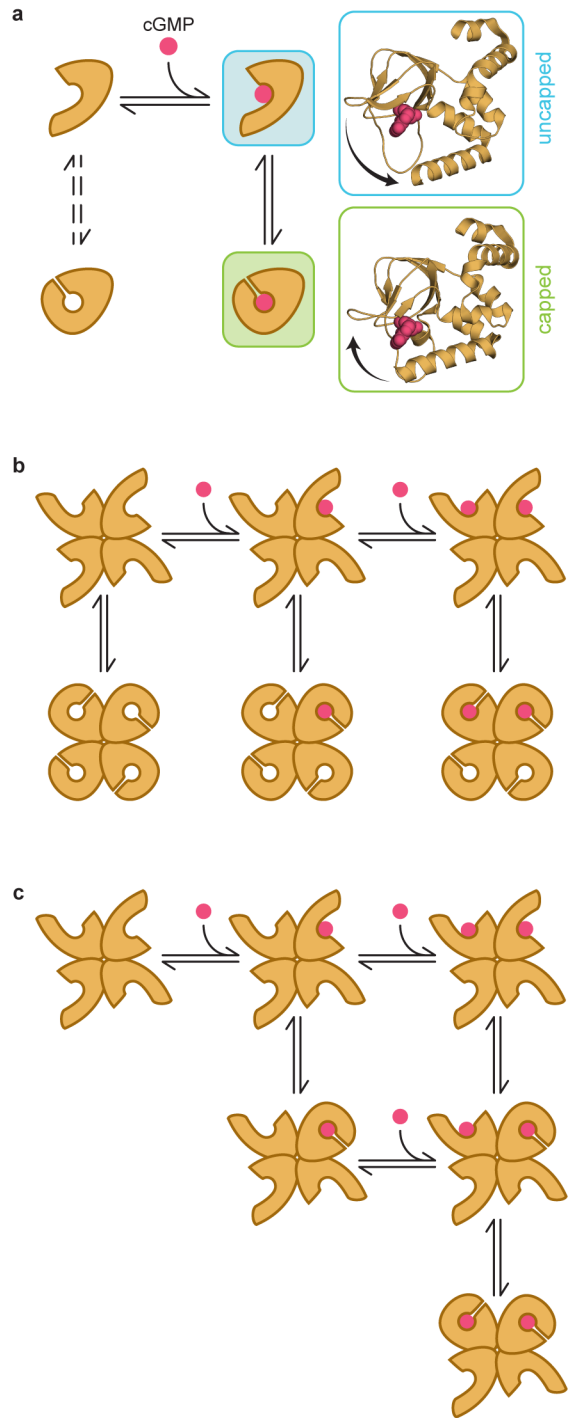

1 each ligation state (b) or individual conformational changes of each ligand-bound CNBD (c). We  
2 were unable to distinguish between these mechanisms. See Supplementary Fig. 10 and  
3 Supplementary Table 3 for all explored models of the first two binding steps and their optimized  
4 rate constants.

## **Supplementary Material for “Single-molecule imaging with cell-derived nanovesicles reveals early binding dynamics at a cyclic nucleotide-gated ion channel”**

Vishal R. Patel<sup>1,3</sup>, Arturo M. Salinas<sup>2</sup>, Darong Qi<sup>1</sup>, Shipra Gupta<sup>1</sup>, David J. Sidote<sup>1</sup>, and Marcel P. Goldschen-Ohm<sup>1\*</sup>

<sup>1</sup>Department of Neuroscience, The University of Texas at Austin

<sup>2</sup>Department of Physics, The University of Texas at Austin

<sup>3</sup>Dell Medical School, The University of Texas at Austin



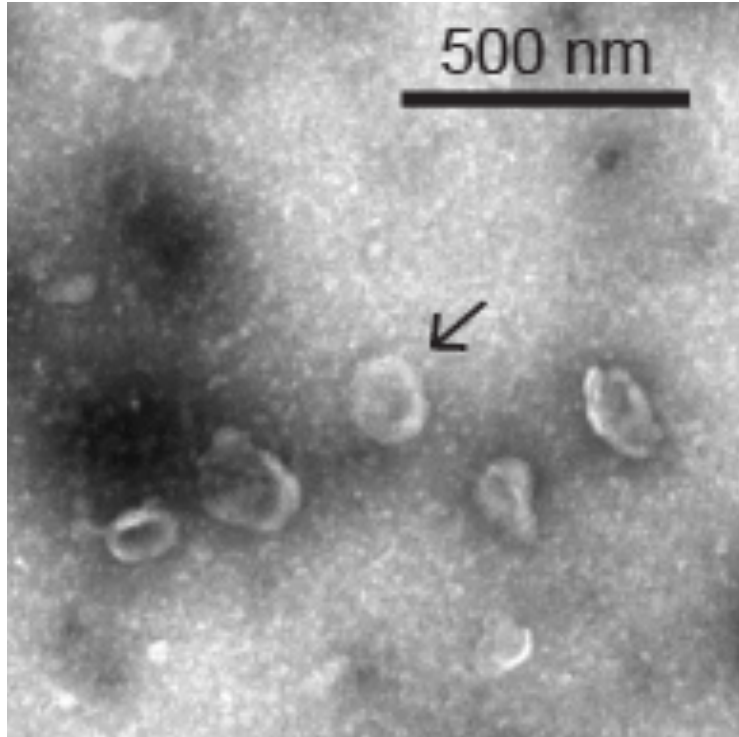

**Supplementary Fig. 1 Transmission electron microscopy (TEM) images of cell-derived nanovesicles.** Vesicle diameters in TEM images of a standard vesicle preparation (see Methods) ranged from approximately 50–1000 nm in diameter similar to previous reports based on dynamic light scattering<sup>1</sup>. Arrow indicates a single vesicle with a diameter of ~150 nm.

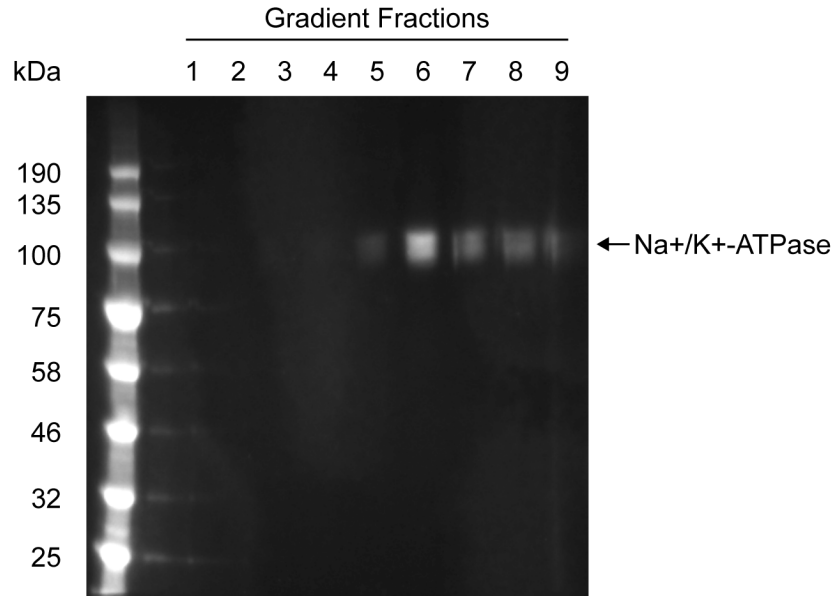

**Supplementary Fig. 2 Western blot of plasma membrane fraction labeling.** The left-most lane corresponds to molecular weight markers used as a standard. The same amount of nanovesicle lysate from fractions 1-8 following density gradient ultracentrifugation was loaded into the corresponding wells. Fractions containing nanovesicles derived from plasma membrane were detecting using fluorescent antibodies specific to Na<sup>+</sup>/K<sup>+</sup>-ATPase, which were enriched in plasma membrane fractions 5-8. These data confirm an earlier report<sup>2</sup>.

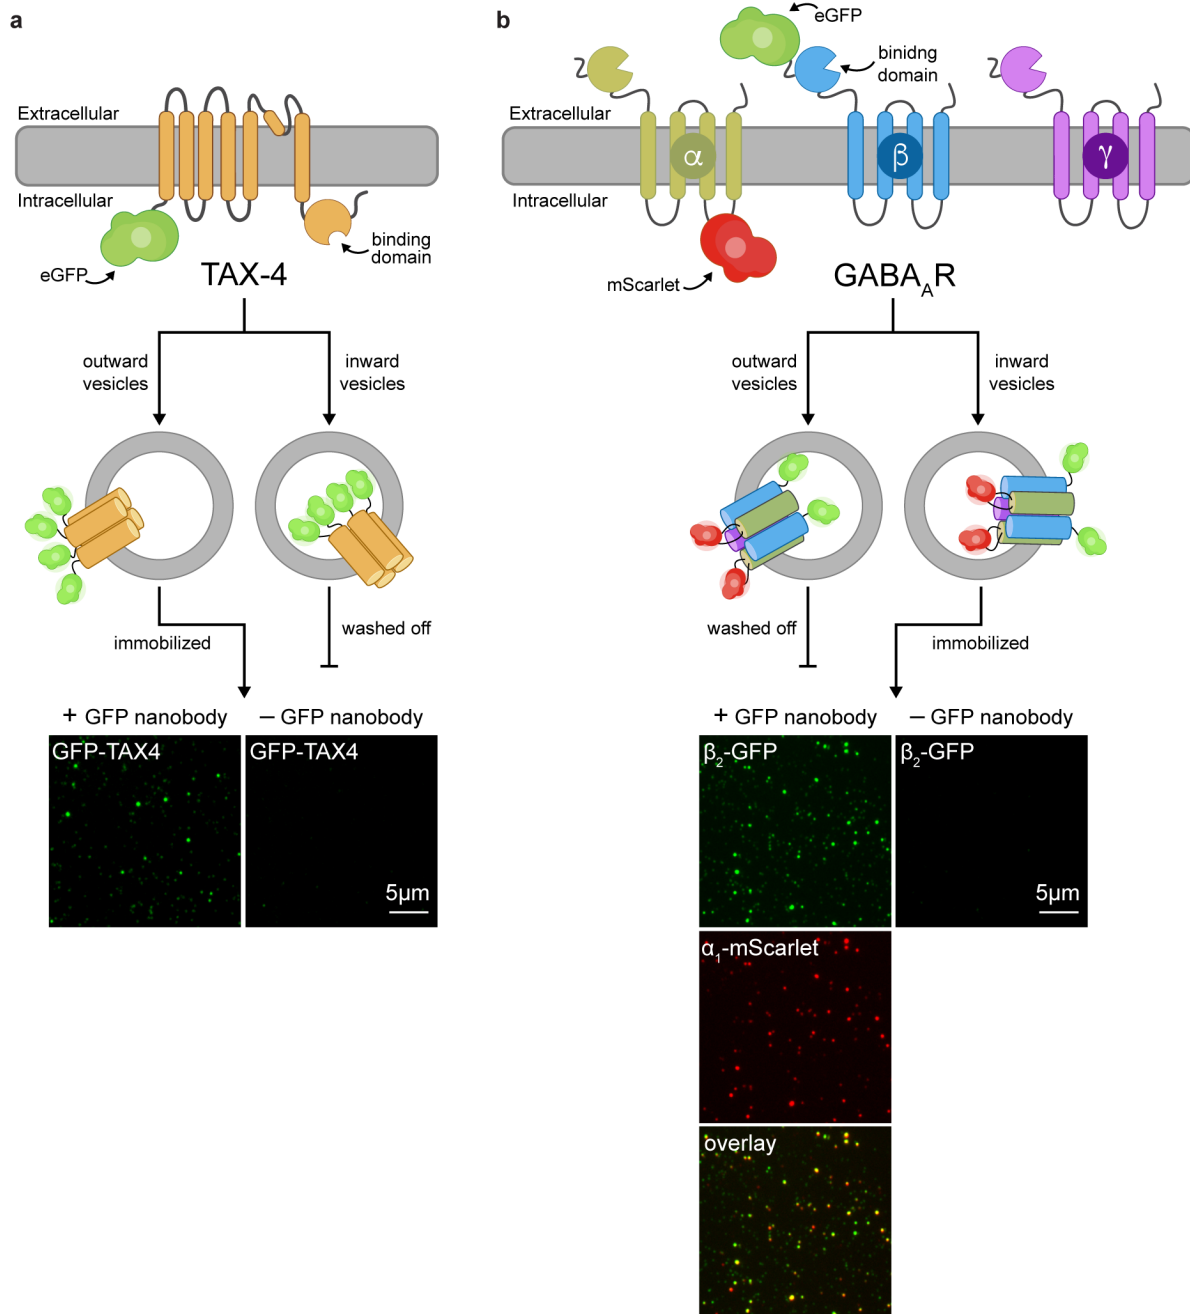

**Supplementary Fig. 3 Specific immobilization of nanovesicles containing a membrane protein of interest.** **a** Cartoon illustrating topology of a GFP-TAX-4 subunit with intracellular cyclic nucleotide binding domain and vesicles derived from cells expressing GFP-TAX-4 tetrameric channels. Below are mmTIRF images of GFP fluorescence (green) showing specific immobilization of GFP-TAX-4 containing vesicles at GFP-nanobodies deposited on the imaging surface (left) and a lack of appreciable nonspecific surface adsorption of vesicles in the absence of GFP-nanobodies (right). In both cases chambers were incubated in GFP-TAX-4 containing vesicles and then rinsed with buffer before imaging. **b** Cartoon illustrating topology of GABA<sub>A</sub> receptor  $\alpha_1$ ,  $\beta_2$  and  $\gamma_{2L}$  subunits and vesicles derived from cells expressing heteropentameric

channels. For visualization and immobilization mScarlet was inserted in the intracellular M3-M4 linker of  $\alpha_1$  ( $\alpha_1$ -mScarlet) and EGFP was inserted near the N-terminus of  $\beta_2$  ( $\beta_2$ -GFP) on the same side of the membrane as the extracellular agonist and benzodiazepine binding domains. Below are mmTIRF images of GFP (green) and mScarlet (red) fluorescence showing colocalization (yellow) of  $\beta_2$ -GFP and  $\alpha_1$ -mScarlet subunits at vesicles immobilized with GFP-nanobodies and a lack of appreciable nonspecific surface adsorption of vesicles in the absence of GFP-nanobodies.

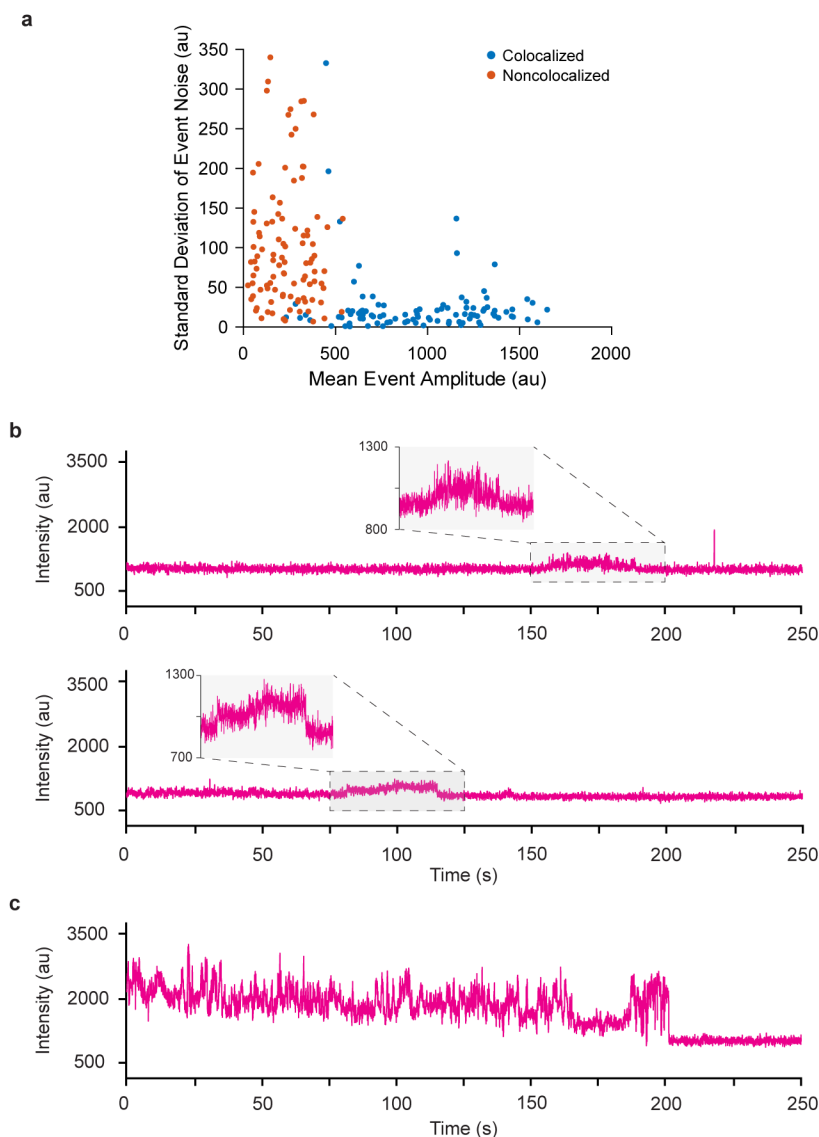

**Supplementary Fig. 4 Distinct properties between colocalized and non-colocalized fcGMP binding events.** **a** A comparison of the mean and standard deviation of the fluorescence signal from individual fcGMP binding events at spots that either do or do not colocalize with GFP-TAX-4 in a single field of view. The non-colocalized binding events are likely due to fluorescent contaminants in the PEG layer or non-specific adsorption of fcGMP to imperfections in the surface passivation. **b** Representative traces for low-intensity non-colocalized fcGMP signals, which make up a majority of the nonspecific signal. **c** Representative trace for high-intensity non-colocalized fcGMP signal likely due to non-specific adsorption to glass imaging surface. These high intensity traces make up a minority of observed non-colocalized signals.

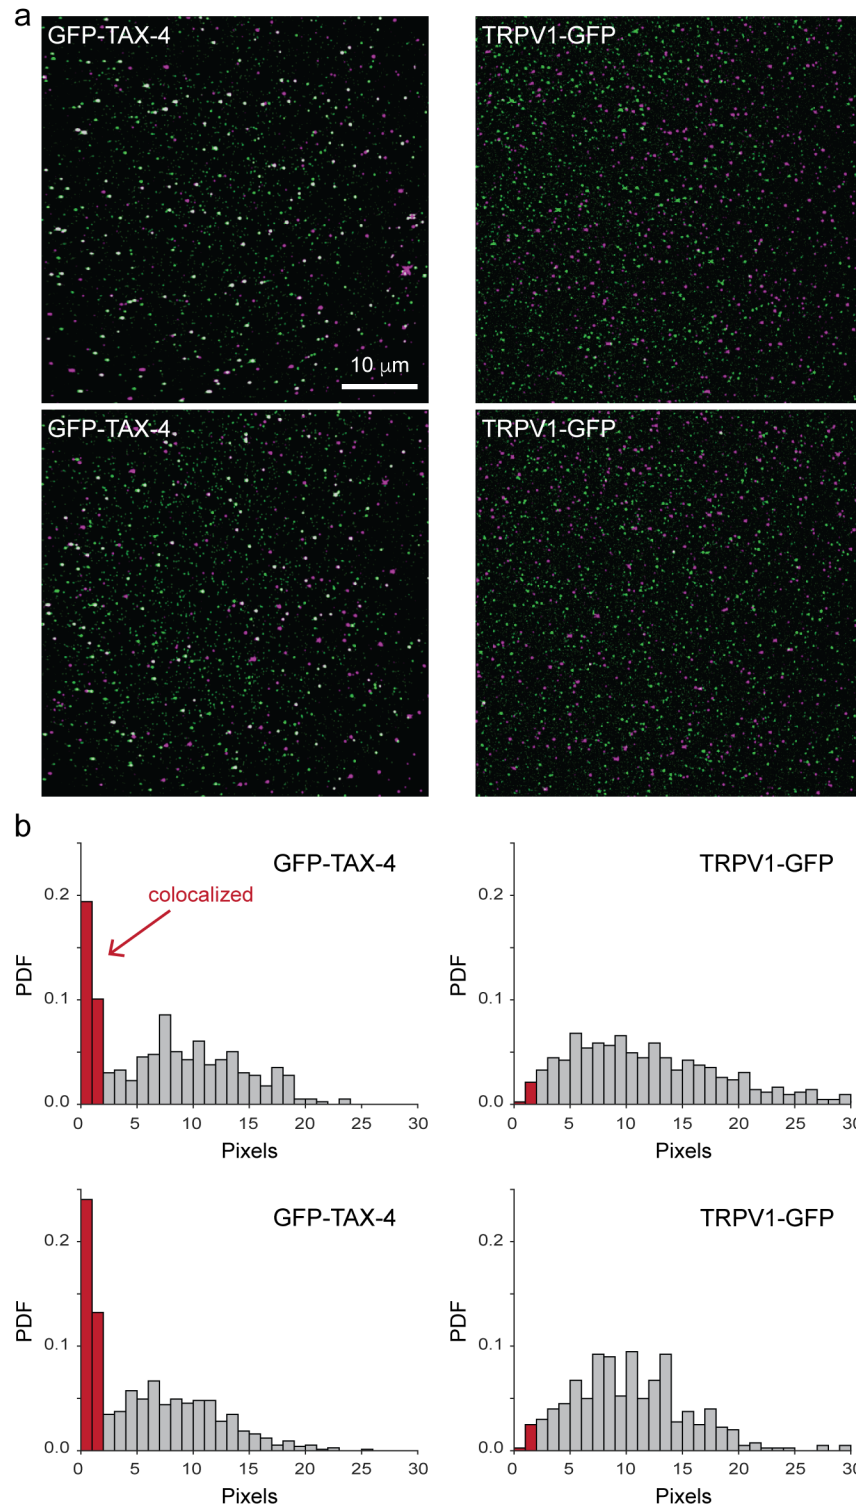

appear white. Note the relative absence of colocalization for TRPV1 channels as compared to TAX-4 channels. Also note that some of the fainter green spots are subthreshold as only the brighter more distinct spots were observed in the presence but not absence of GFP. **b** Histograms of the nearest neighbor distance from each identified GFP location to the closest identified fcGMP location. Two separate examples are shown for both GFP-TAX-4 and TRPV1-GFP vesicle preparations. The percentage (mean  $\pm$  standard deviation) of GFP spots that colocalized with fcGMP spots (i.e. were within 3 pixels) across the dataset were for GFP-TAX-4 (at each fcGMP concentration):  $33 \pm 9\%$  (10 nM),  $32 \pm 9\%$  (30 nM),  $31 \pm 7\%$  (60 nM), 33% (100 nM), and  $39 \pm 3\%$  (200 nM). For TRPV1-GFP at 10 nM fcGMP a background colocalization of  $7 \pm 0.5\%$  was observed.

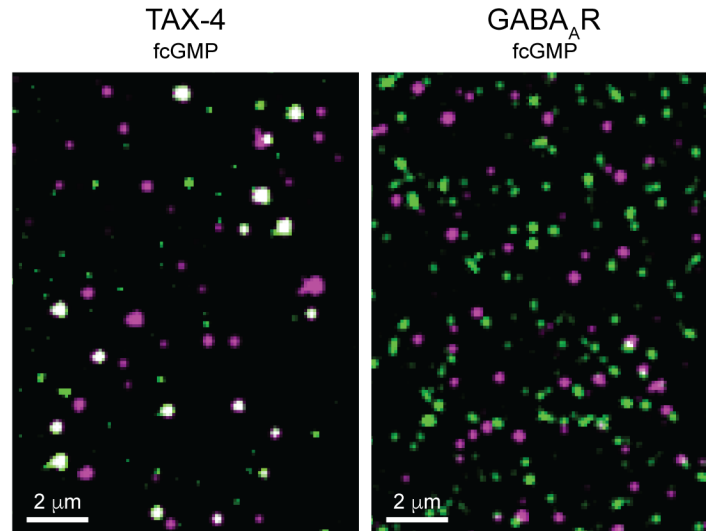

**Supplementary Fig. 6 No colocalization between immobilized GABA<sub>A</sub>R containing nanovesicles and fcGMP.** Time averaged fluorescence for GFP (green) from nanovesicles containing either GFP-TAX-4 (left) or GABA<sub>A</sub> receptor  $\alpha_1$ ,  $\beta_2$  and  $\gamma_{2L}$  subunits with GFP inserted in the N-terminus of the  $\beta_2$  subunit ( $\beta_2$ -GFP) (right) overlaid with 100 nM fcGMP (magenta) from the same field of view. Colocalized GFP and fcGMP signals appear white. See Supplementary Fig. 3 for a description of the GABA<sub>A</sub>R subunits.



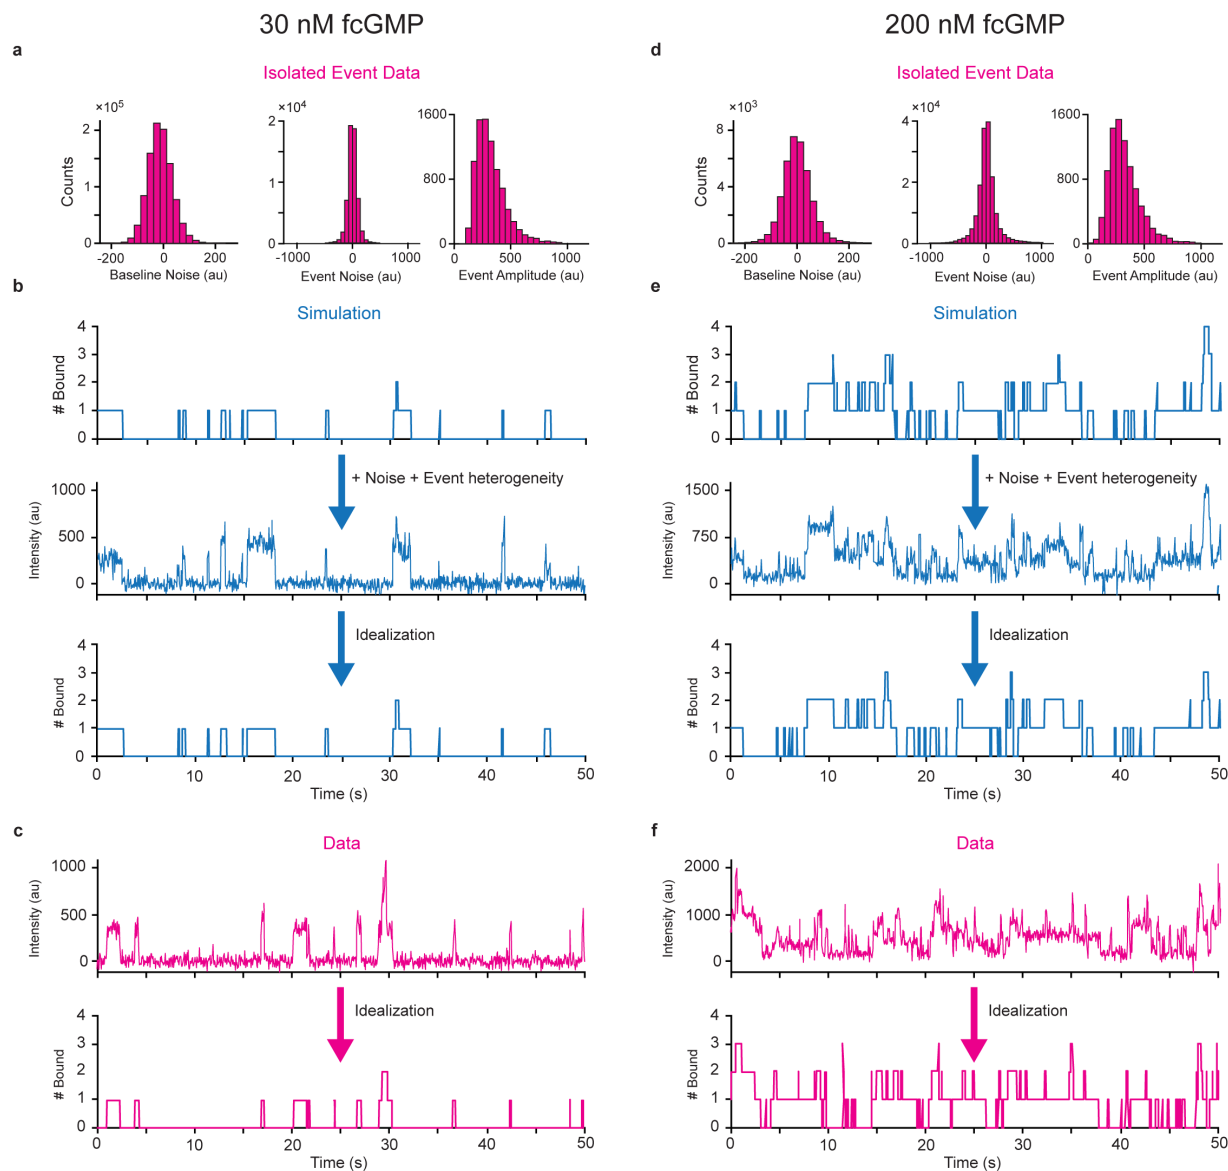

**Supplementary Fig. 7 Evaluating the accuracy of idealization of fluorescence time series for ligand binding using simulated data.** **a** Distributions of baseline noise, event noise, and event amplitudes for experimental binding data from single, isolated events at 30 nM fcGMP. **b** Example of time series from independent site binding simulations, followed by addition of gaussian noise and event amplitude heterogeneity representing isolated event data (a), followed by the results of our idealization procedure. Comparison of the known simulated time series to the results of our idealization procedure after adding noise drawn from experimental observations provides a metric for testing the accuracy of our idealization procedure (see Methods in main text). **c** Example of binding data at 30 nM fcGMP, followed by the results of our idealization procedure. **d-f** Same as described for **a-c**, but for simulations and data at 200 nM fcGMP.

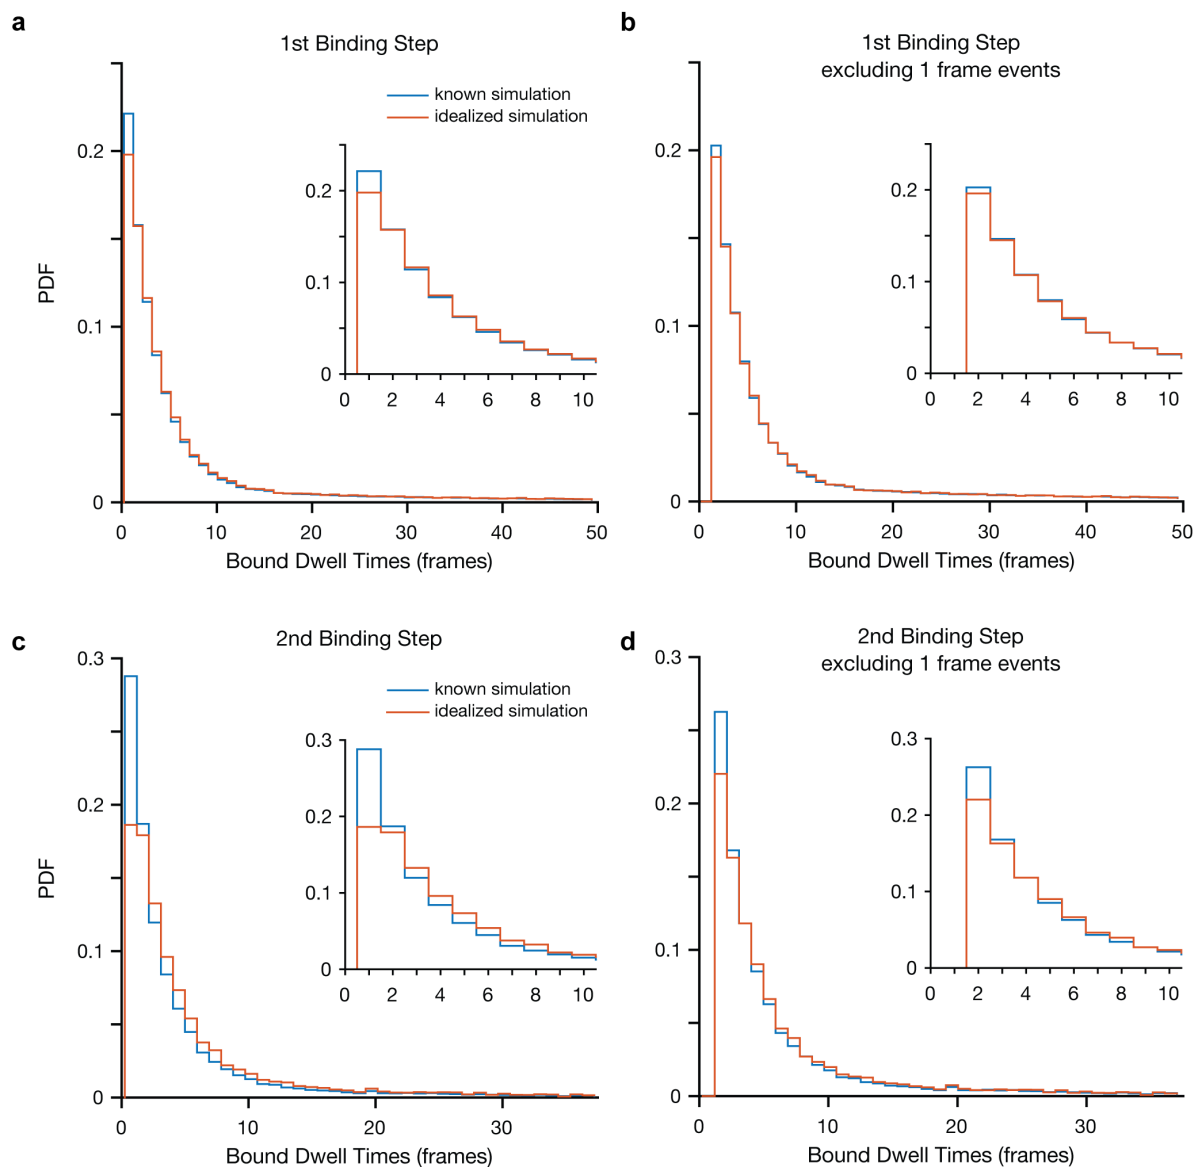

**Supplementary Fig. 8 Missed events during idealization of simulated fluorescence time series.** **a-b** Simulated bound dwell time distributions of isolated singly bound events either including (a) or excluding (b) single frame events. Note that durations are shown in frames. Comparison of known simulated bound series (blue) to the idealized bound series obtained from idealization after adding experimentally relevant noise and event heterogeneity (red). The primary discrepancy is limited to events lasting only a single frame, which are sometimes missed during the idealization procedure. However, nearly all events lasting two or more frames are reliably detected. **c-d** Same as described for (a-b), but for dwell times in doubly bound states. All simulations were run with a frame rate of 20 Hz (50 ms per frame), equivalent to experimental recordings.

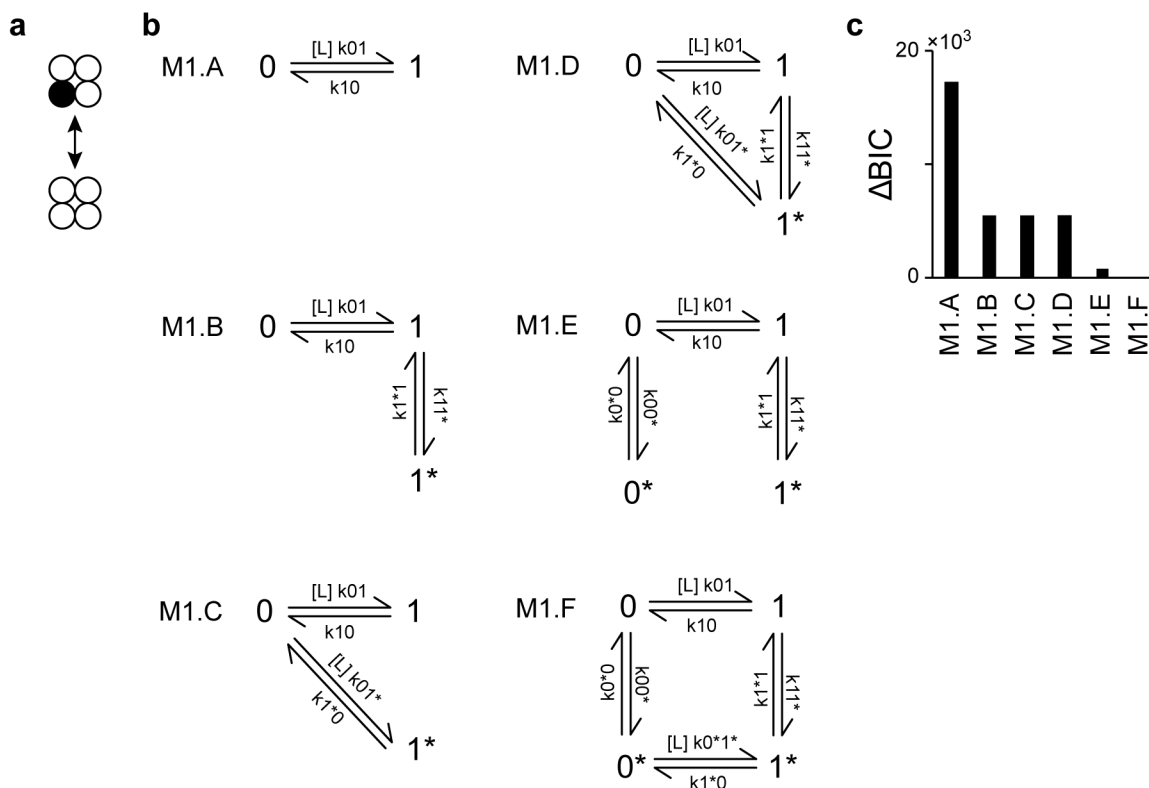

**Supplementary Fig. 9 Single site dynamics for the first binding event.** **a** Schematic illustrating binding to the first of four sites per channel. CNBDs depicted in unbound (open circles) and bound (filled circle) conformations. **b** Evaluated single site models describing binding and conformational exchange between distinct bound or unbound states. State names indicate the number of bound ligands and an asterisk denotes distinct states having the same number of bound sites. Rate constants are in  $\mu\text{M}^{-1}\text{s}^{-1}$  for binding transitions ( $0 \rightarrow 1$ ,  $0 \rightarrow 1^*$ ,  $0^* \rightarrow 1^*$ ) and  $\text{s}^{-1}$  for all other transitions. [L] indicates ligand concentration for binding steps. Rate constants were optimized in QuB for data segments comprised of isolated binding events (no stacked events) across all molecules and concentrations (see Methods in main text). For models M1.D and M1.F one of the rate constants was constrained to enforce microscopic reversibility in the loop. Rate constants and their estimated errors are given in Supplementary Table 2. **c** BIC scores for the models shown in C relative to the model with the best score (smaller score is better;  $\Delta\text{BIC} = \text{BIC} - \text{BIC}_{\text{best model}}$ ).

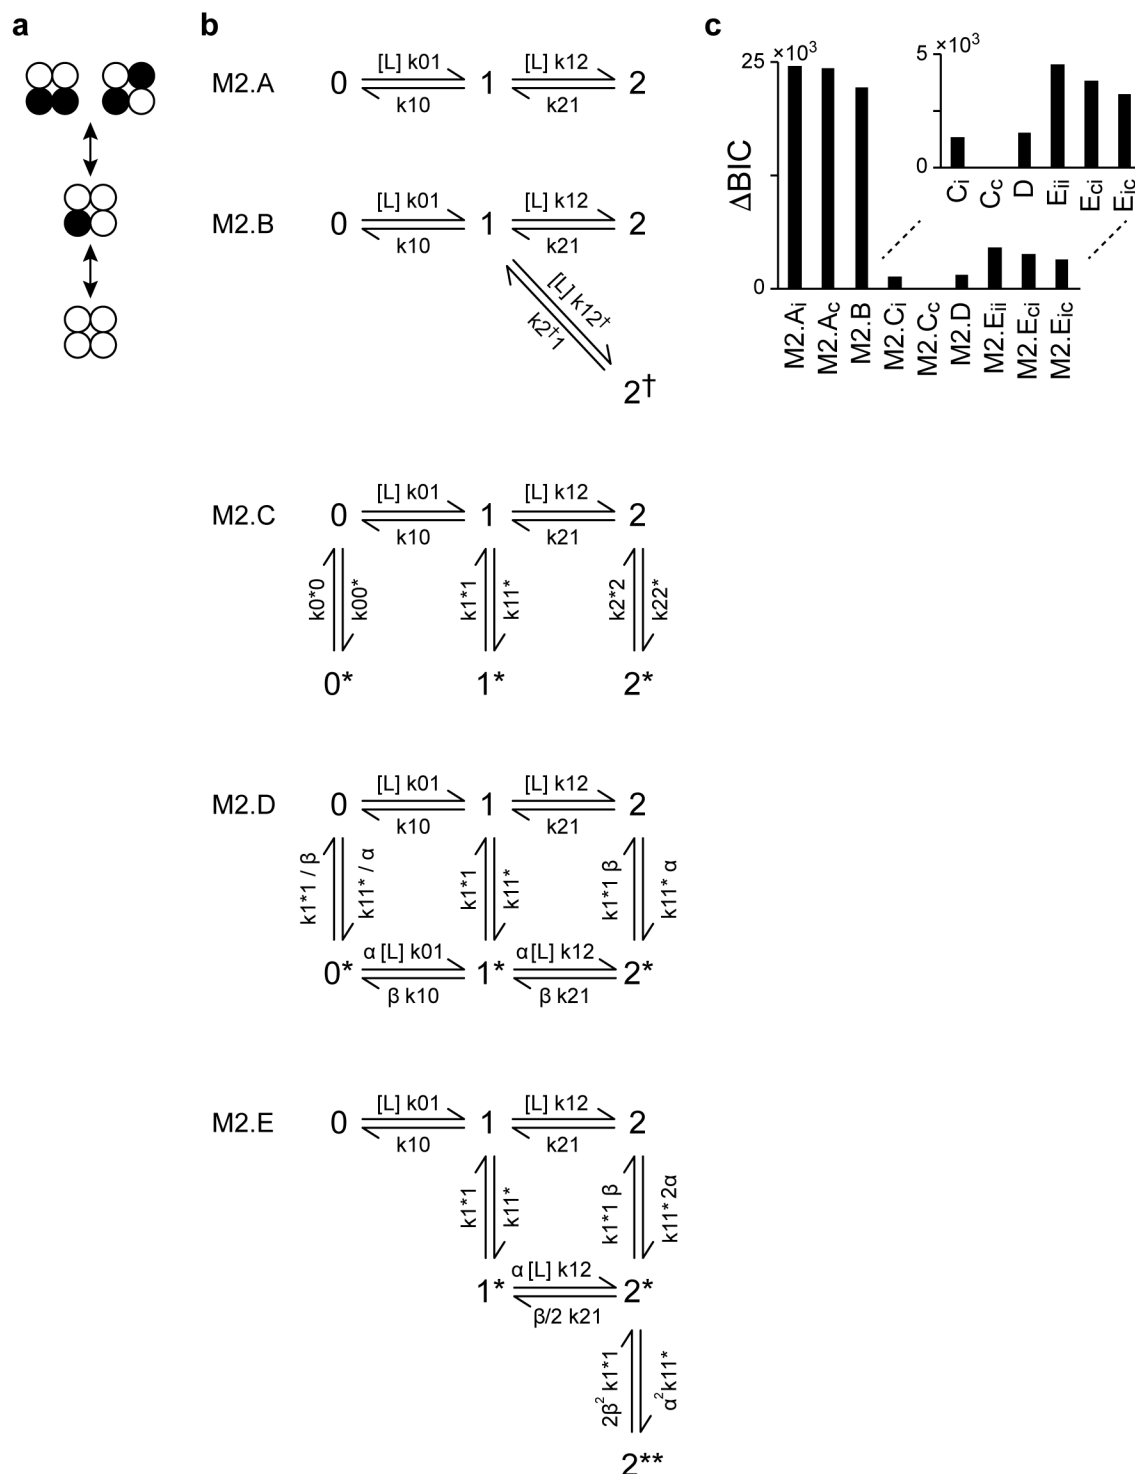

**Supplementary Fig. 10 Dynamics for the first two binding events.** **a** Schematic illustrating binding to the first two of four sites per channel. CNBDs depicted in unbound (open circles) and bound (filled circle) conformations. **b** Evaluated two site models describing binding and conformational exchange between distinct bound or unbound states. State names indicate the number of bound ligands and an asterisk denotes distinct states having the same number of occupied sites. Rate constants are in  $\mu\text{M}^{-1}\text{s}^{-1}$  for binding transitions ( $0 \rightarrow 1$ ,  $1 \rightarrow 2$ ,  $1 \rightarrow 2^{\dagger}$ ,  $0^* \rightarrow$

$1^*$ ,  $1^* \rightarrow 2^*$ ) and  $s^{-1}$  for all other transitions. [L] indicates ligand concentration for binding steps. M2.A is the simplest possible scheme for sequential binding at two sites. M2.B allows for two distinct di-liganded states (e.g. adjacent and diagonally opposed occupied sites as depicted in *a*). M2.C and M2.D extend M2.A with a global conformational change of both sites (between state  $i$  and  $i^*$ ). M2.E describes binding followed by a conformational change at each site separately. Note that only model M2.B distinguishes between adjacent and diagonal doubly bound conformations in the channel tetramer. Each model is further subdivided into several models sharing the same schematic but differing in the applied constraints. For example, M2.A<sub>i</sub> and M2.A<sub>c</sub> both have the M2.A structure, but A<sub>i</sub> constrains the two binding steps to be identical and independent, whereas A<sub>c</sub> allows the dynamics for the two steps to differ (i.e. allows cooperativity between binding sites). Models C<sub>i</sub> and C<sub>c</sub> share the same constraints as A<sub>i</sub> and A<sub>c</sub>. M2.E<sub>ii</sub> assumes completely independent and identical sites, whereas M2.E<sub>ci</sub> allows for binding of the 2<sup>nd</sup> ligand to differ from that of the first (binding cooperativity), and M2.E<sub>ic</sub> allows the conformational change following binding at either site to depend on the number of bound ligands. See Supplementary Table 3 for a description of all applied constraints. Rate constants were optimized in QuB for the entire data set across all molecules and concentrations excluding events with more than two bound ligands (see Methods in main text). Rate constants and their estimated errors are given in Supplementary Table 3 along with model constraints. **c** BIC scores for each model relative to the model with the best score (smaller score is better;  $\Delta\text{BIC} = \text{BIC} - \text{BIC}_{\text{best model}}$ ). See description above for model subscripts.

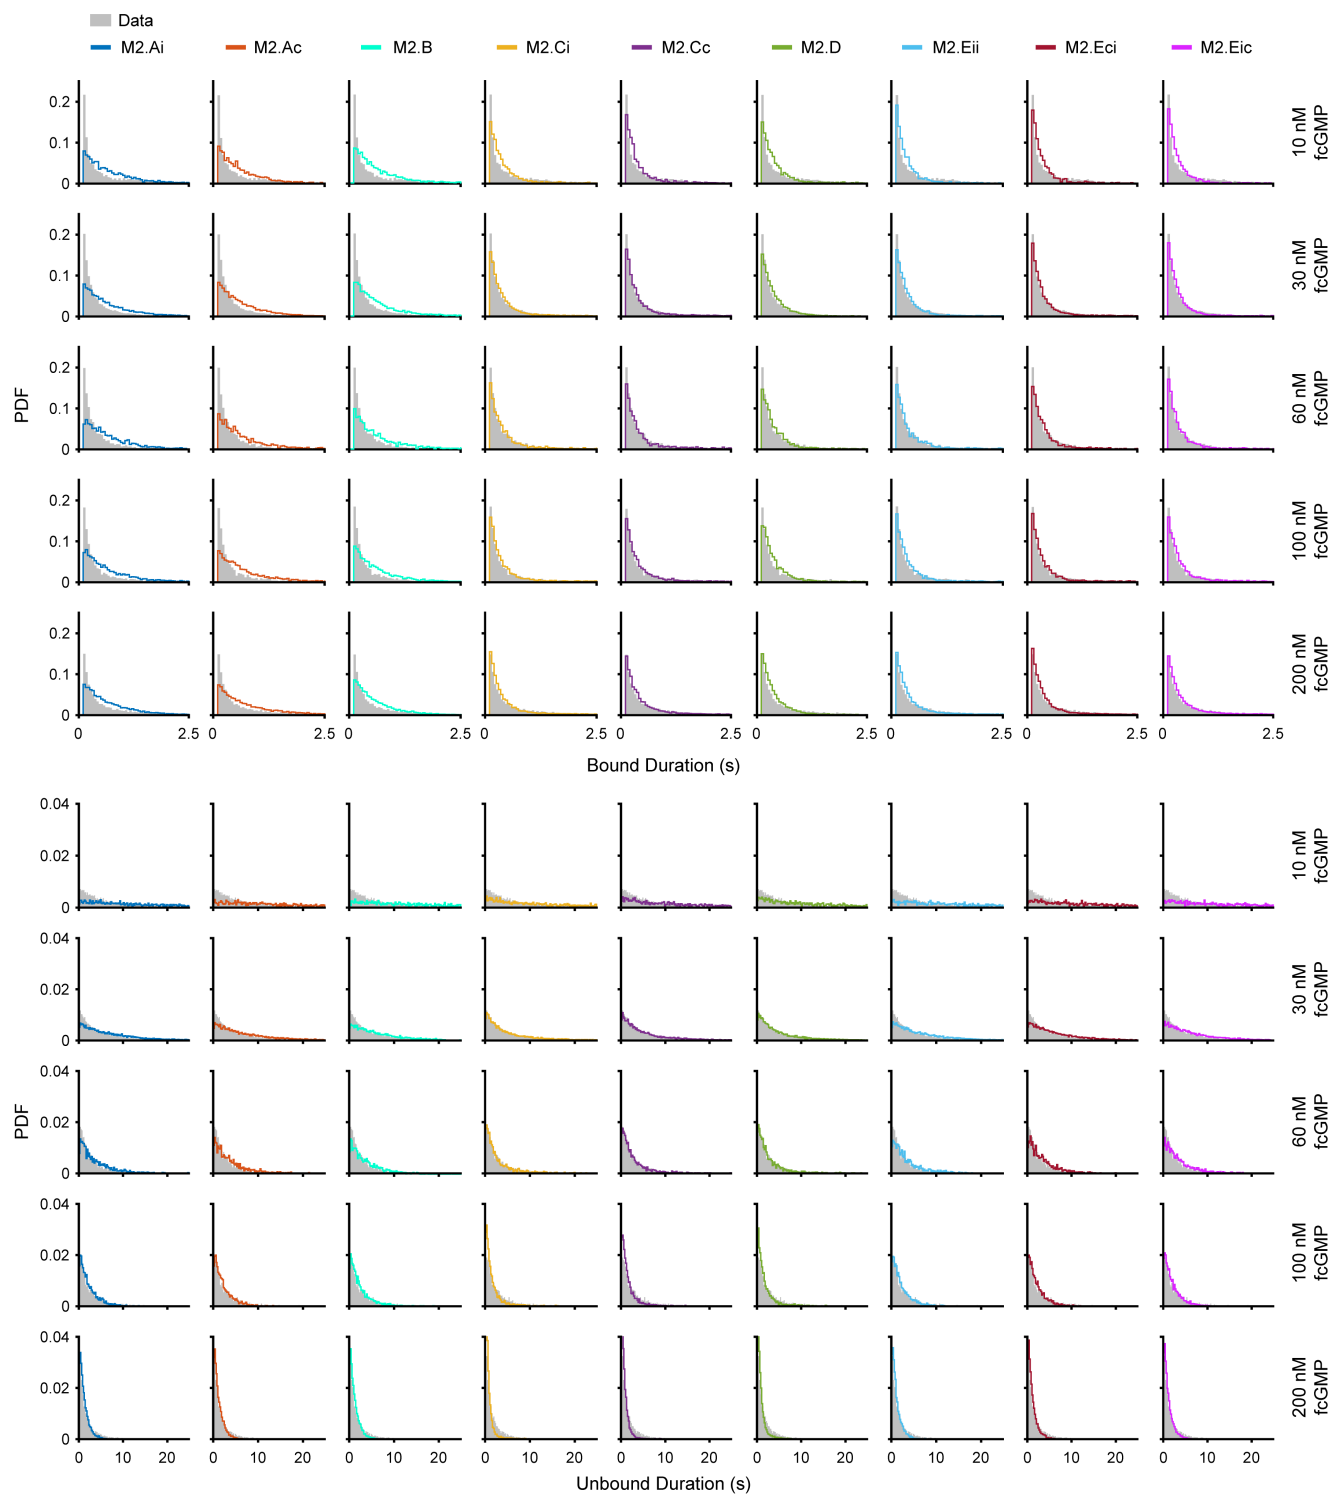

**Supplementary Fig. 11 Comparison of observed dwell time distributions with predictions for two-site models.** Experimentally observed bound and unbound dwell time distributions (gray) overlaid with predicted distributions from simulated bound time series for each two-site model (colored; see Supplementary Fig. 10). For each ligand concentration, simulations matched the length of data collected.

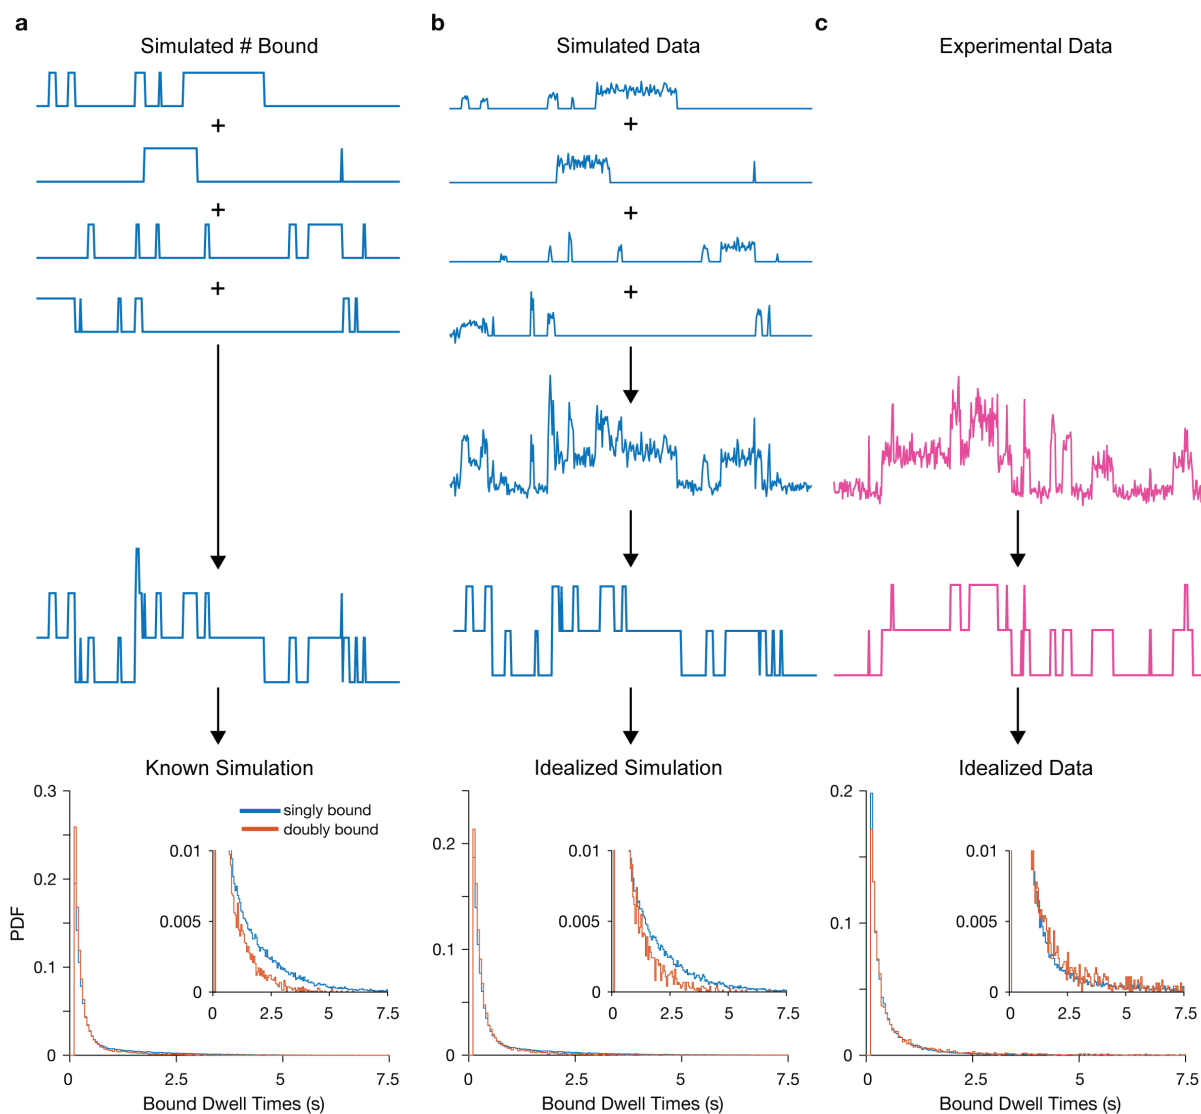

**Supplementary Fig. 12 Comparison of experimental data with simulations for independent CNBDs.** **a** Four simulated single-site bound time series were added together to generate bound series representative of tetramers comprised of independent CNBDs. **b** Gaussian noise and event amplitude heterogeneity were added to simulated bound series to reflect experimental observations, and the noisy simulations were idealized to obtain bound series. **c** Experimental fcGMP binding fluorescence traces idealized to obtain estimated bound series in exactly the same way as for the simulated data in (b). Dwell time distribution in singly bound (blue; one of four CNBDs occupied) and doubly-bound (red; two of four CNBDs occupied) states are shown for both known simulations (a), idealized simulations after adding noise (b), and experimental fcGMP fluorescence traces (c). The reduction in long-lived doubly bound events as compared to singly-bound events in the simulated data is a consequence of the fact that unbinding of either ligand will exit a doubly-bound state.

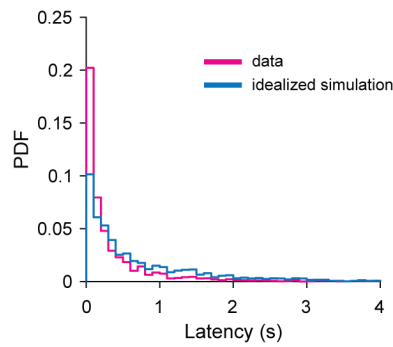

**Supplementary Fig. 13 Latency between 1<sup>st</sup> and 2<sup>nd</sup> binding events.** Distribution of latencies to binding of the second ligand after binding the first ligand. Comparison between our experimental data (magenta) and simulations for four independent sites (blue, see Methods in main text)



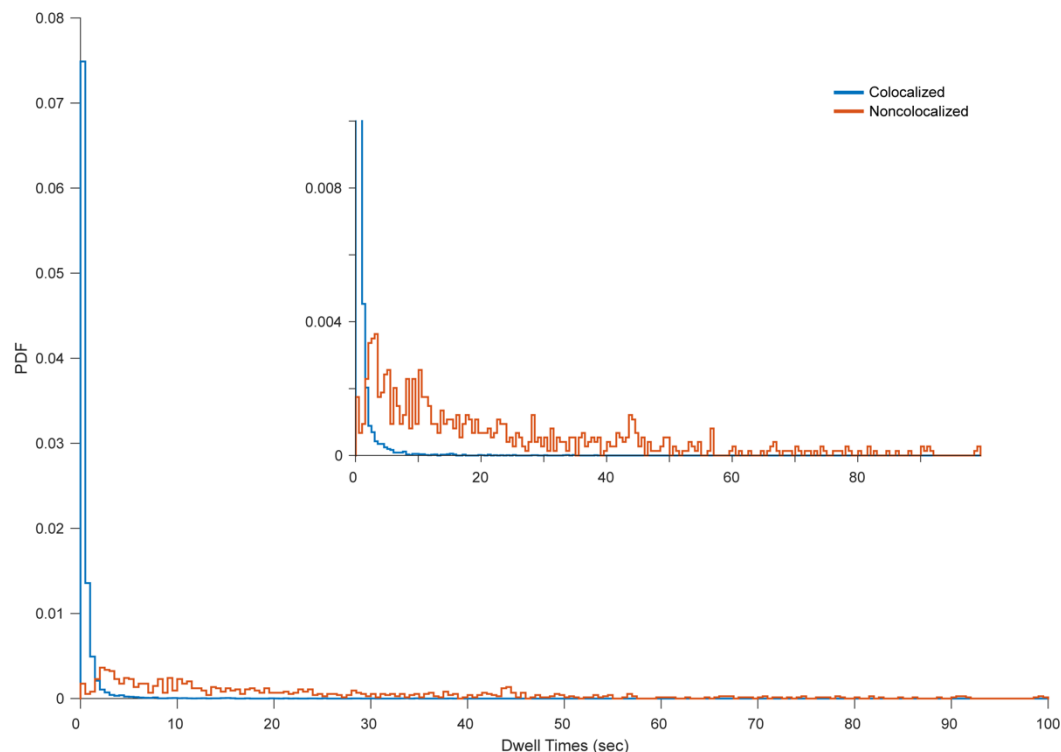

**Supplementary Fig. 14 Photobleaching of single fcGMP molecules.** Lifetimes of individual fcGMP molecules at noncolocalized spots assumed to largely reflect dye adsorption to the surface and subsequent termination by photobleaching. The abscissa is limited to the first 100 seconds for visualization, although lifetimes up to 143 seconds were observed. Lifetimes of colocalized binding events at TAX-4 channels in 30 nM fcGMP are shown for comparison. The mean lifetime for noncolocalized events was 23.4 seconds, an order of magnitude longer than the time constant for the longest duration bound component (Supplementary Table 1).

| [fcGMP]<br>(nM) | Bound Durations       |                       |                    |      | Unbound Durations     |                       |                    |      |
|-----------------|-----------------------|-----------------------|--------------------|------|-----------------------|-----------------------|--------------------|------|
|                 | $\tau_1$ (s) [95% CI] | $\tau_2$ (s) [95% CI] | A1 [95% CI]        | A2   | $\tau_1$ (s) [95% CI] | $\tau_2$ (s) [95% CI] | A1 [95% CI]        | A2   |
| 10              | 0.05 [0.043-0.057]    | 1.6 [1.5-1.7]         | 0.81 [0.78 - 0.83] | 0.19 | 4.2 [3.9-4.5]         | 21 [19-23]            | 0.76 [0.68 - 0.84] | 0.24 |
| 30              | 0.17 [0.16-0.18]      | 1.8 [1.7-1.9]         | 0.83 [0.8 - 0.86]  | 0.17 | 3.8 [3.6-4]           | 12 [11-13]            | 0.75 [0.65 - 0.85] | 0.25 |
| 60              | 0.19 [0.17-0.21]      | 1.6 [1.4-1.8]         | 0.85 [0.79 - 0.91] | 0.15 | 2.1 [1.7-2.5]         | 11 [10-12]            | 0.85 [0.83 - 0.87] | 0.15 |
| 100             | 0.15 [0.14-0.16]      | 2.5 [2.3-2.7]         | 0.79 [0.75 - 0.83] | 0.21 | 1.7 [1.5-1.9]         | 4.1 [2-6.2]           | 0.55 [0.45 - 0.65] | 0.45 |
| 200             | 0.18 [0.17-0.19]      | 2.4 [2.3-2.5]         | 0.81 [0.78 - 0.84] | 0.19 | 1.3 [1.2-1.4]         | 5.7 [4.9-6.5]         | 0.82 [0.75 - 0.89] | 0.18 |

**Supplementary Table 1.** Time constants ( $\tau$ ) and relative weights (A) for biexponential maximum likelihood fits to bound and unbound dwell time distributions across tested fcGMP concentrations.

| Model | $k_{0 \rightarrow 1}$ | $k_{1 \rightarrow 0}$ | $k_{1 \rightarrow 1^*}$ | $k_{1^* \rightarrow 1}$ | $k_{0 \rightarrow 0^*}$ | $k_{0^* \rightarrow 0}$ | $k_{0^* \rightarrow 1^*}$ | $k_{1^* \rightarrow 0^*}$ | $k_{0 \rightarrow 1^*}$       | $k_{1^* \rightarrow 0}$       | $\Delta\text{BIC}$ |
|-------|-----------------------|-----------------------|-------------------------|-------------------------|-------------------------|-------------------------|---------------------------|---------------------------|-------------------------------|-------------------------------|--------------------|
| M1.A  | 4.2<br>$\pm 0.2$      | 2.3<br>$\pm 0.04$     | –                       | –                       | –                       | –                       | –                         | –                         | –                             | –                             | 17175              |
| M1.B  | 4.4<br>$\pm 0.2$      | 4.5<br>$\pm 0.1$      | 0.54<br>$\pm 0.06$      | 0.54<br>$\pm 0.05$      | –                       | –                       | –                         | –                         | –                             | –                             | 5412               |
| M1.C  | 3.8<br>$\pm 0.1$      | 5.1<br>$\pm 0.2$      | –                       | –                       | –                       | –                       | –                         | –                         | 0.58<br>$\pm 0.07$            | 0.47<br>$\pm 0.04$            | 5412               |
| M1.D  | 4.4<br>$\pm 0.2$      | 4.5<br>$\pm 0.1$      | 0.54<br>$\pm 0.06$      | 0.54<br>$\pm 0.05$      | –                       | –                       | –                         | –                         | 5.7e-8<br>$\pm 0.1\text{e-}8$ | 5.8e-7<br>$\pm 0.1\text{e-}7$ | 5427               |
| M1.E  | 7.0<br>$\pm 0.3$      | 4.5<br>$\pm 0.1$      | 0.54<br>$\pm 0.06$      | 0.54<br>$\pm 0.05$      | 0.06<br>$\pm 0.003$     | 0.17<br>$\pm 0.01$      | –                         | –                         | –                             | –                             | 797                |
| M1.F  | 7.4<br>$\pm 0.3$      | 4.7<br>$\pm 0.1$      | 0.25<br>$\pm 0.04$      | 0.27<br>$\pm 0.03$      | 0.03<br>$\pm 0.001$     | 0.05<br>$\pm 0.002$     | 0.74<br>$\pm 0.37$        | 0.31<br>$\pm 0.02$        | –                             | –                             | 0                  |

**Supplementary Table 2.** Rate constants and relative BIC scores for single site models (**Supplementary Fig. 9**). Units are  $\mu\text{M}^{-1}\text{s}^{-1}$  for binding transitions ( $k_{0 \rightarrow 1}$ ,  $k_{0 \rightarrow 1^*}$ ,  $k_{0^* \rightarrow 1^*}$ ) and  $\text{s}^{-1}$  for all other transitions. Rate constants were optimized in QuB for data segments comprised of isolated binding events (no stacked events) across all molecules and concentrations (see Methods in main text). For models M1.D and M1.F one of the rate constants was constrained to enforce microscopic reversibility in the loop. Errors are standard deviations across optimized rate constants for five randomized folds of the data set where each fold contained  $\sim 20\%$  of the data for each concentration.

| Model              | $k_{0 \rightarrow 1}$ | $k_{1 \rightarrow 0}$ | $k_{1 \rightarrow 2}$            | $k_{2 \rightarrow 1}$   | $k_{1 \rightarrow 2^\dagger}$ | $k_{2^\dagger \rightarrow 1}$ | $k_{0 \rightarrow 0^*}$                  | $k_{0^* \rightarrow 0}$                 | $k_{1 \rightarrow 1^*}$ | $k_{1^* \rightarrow 1}$ | $k_{2 \rightarrow 2^*}$         | $k_{2^* \rightarrow 2}$       | $\alpha$     | $\beta$      | $\Delta\text{BIC}$ |
|--------------------|-----------------------|-----------------------|----------------------------------|-------------------------|-------------------------------|-------------------------------|------------------------------------------|-----------------------------------------|-------------------------|-------------------------|---------------------------------|-------------------------------|--------------|--------------|--------------------|
| M2.A <sub>i</sub>  | 4.4 ± 0.1             | 1.6 ± 0.04            | $\frac{3}{4}k_{0 \rightarrow 1}$ | 2 $k_{1 \rightarrow 0}$ | –                             | –                             | –                                        | –                                       | –                       | –                       | –                               | –                             | –            | –            | 27209              |
| M2.A <sub>c</sub>  | 4.4 ± 0.1             | 1.8 ± 0.1             | 3.4 ± 0.1                        | 1.6 ± 0.1               | –                             | –                             | –                                        | –                                       | –                       | –                       | –                               | –                             | –            | –            | 24584              |
| M2.B               | 4.4 ± 0.1             | 1.9 ± 0.1             | 3.0 ± 0.1                        | 4.2 ± 0.2               | 0.50 ± 0.03                   | 0.30 ± 0.02                   | –                                        | –                                       | –                       | –                       | –                               | –                             | –            | –            | 22191              |
| M2.C <sub>i</sub>  | 8.0 ± 0.2             | 3.6 ± 0.1             | $\frac{3}{4}k_{0 \rightarrow 1}$ | 2 $k_{1 \rightarrow 0}$ | –                             | –                             | 0.11 ± 0.02                              | 0.24 ± 0.03                             | 0.51 ± 0.04             | 0.55 ± 0.03             | 2.1 ± 0.1                       | 0.84 ± 0.02                   | –            | –            | 1338               |
| M2.C <sub>c</sub>  | 7.0 ± 0.1             | 4.2 ± 0.1             | 8.5 ± 0.3                        | 3.7 ± 0.1               | –                             | –                             | 0.06 ± 0.01                              | 0.18 ± 0.02                             | 0.77 ± 0.05             | 0.68 ± 0.03             | 0.50 ± 0.03                     | 0.40 ± 0.03                   | –            | –            | 0                  |
| M2.D               | 8.0 ± 0.2             | 3.8 ± 0.1             | $\frac{3}{4}k_{0 \rightarrow 1}$ | 2 $k_{1 \rightarrow 0}$ | –                             | –                             | $\frac{1}{\alpha} k_{1 \rightarrow 1^*}$ | $\frac{1}{\beta} k_{1^* \rightarrow 1}$ | 0.01 ± 0.001            | 0.01 ± 0.001            | $\alpha k_{1 \rightarrow 1^*}$  | $\beta k_{1^* \rightarrow 1}$ | 0.18 ± 0.005 | 0.11 ± 0.003 | 1537               |
| M2.E <sub>ii</sub> | 4.6 ± 0.1             | 3.9 ± 0.1             | $\frac{3}{4}k_{0 \rightarrow 1}$ | 2 $k_{1 \rightarrow 0}$ | –                             | –                             | –                                        | –                                       | 0.46 ± 0.04             | 0.34 ± 0.02             | $2\alpha k_{1 \rightarrow 1^*}$ | $\beta k_{1^* \rightarrow 1}$ | 1            | 1            | 4550               |
| M2.E <sub>ic</sub> | 4.8 ± 0.1             | 4.1 ± 0.1             | $\frac{3}{4}k_{0 \rightarrow 1}$ | 2 $k_{1 \rightarrow 0}$ | –                             | –                             | –                                        | –                                       | 0.53 ± 0.04             | 0.44 ± 0.02             | $2\alpha k_{1 \rightarrow 1^*}$ | $\beta k_{1^* \rightarrow 1}$ | 0.75 ± 0.04  | 0.49 ± 0.02  | 3834               |
| M2.E <sub>ci</sub> | 4.7 ± 0.1             | 4.3 ± 0.1             | 3.5 ± 0.1                        | 4.1 ± 0.2               | –                             | –                             | –                                        | –                                       | 0.44 ± 0.04             | 0.34 ± 0.02             | $2\alpha k_{1 \rightarrow 1^*}$ | $\beta k_{1^* \rightarrow 1}$ | 1            | 1            | 3236               |

**Supplementary Table 3.** Rate constants and relative BIC scores for models of the first two binding steps (**Supplementary Fig. 10**). Units are  $\mu\text{M}^{-1}\text{s}^{-1}$  for binding transitions ( $k_{0 \rightarrow 1}$ ,  $k_{1 \rightarrow 2}$ ,  $k_{0^* \rightarrow 1^*}$ ,  $k_{1^* \rightarrow 2^*}$ ) and  $\text{s}^{-1}$  for all other transitions. Gray shaded cells indicate constraints, and all other cells were free parameters. All constraints for  $k_{1 \rightarrow 2}$  and  $k_{2 \rightarrow 1}$  reflect the statistical factors associated with independent binding at each site in a tetramer, whereas otherwise the binding steps were allowed to differ (i.e. be cooperative). Constraints for model M2.C transitions  $k_{i \rightarrow i^*}$  and  $k_{i^* \rightarrow i}$  reflect the additive effect of ligand binding on the conformational change between states  $i$  and  $i^*$  as depicted by the factors  $\alpha$  and  $\beta$  in Supplementary Fig. 10. For all three M2.D models, constraints on transitions not involving ligand binding/unbinding imply that the ratio of the transition rate for the conformational change in doubly liganded states

( $2 \rightarrow 2^*$ ) to that in singly liganded states ( $1 \rightarrow 1^*$ ) is given by  $\alpha$ , and the factor of 2 is a statistical factor given that either site could undergo the conformational change. Likewise, the ratio of the reverse transition rates for  $2^* \rightarrow 2$  and  $1^* \rightarrow 1$  is given by  $\beta$ . Constraints for all M2.D models not shown in the table are  $k_{1^* \rightarrow 2^*} = \alpha k_{1 \rightarrow 2}$ ,  $k_{2^* \rightarrow 1^*} = (\beta/2) k_{2 \rightarrow 1}$ ,  $k_{2^* \rightarrow 2^{**}} = (\alpha/2) k_{2 \rightarrow 2^*}$  and  $k_{2^{**} \rightarrow 2^*} = 2\beta k_{2^* \rightarrow 2}$ . Rate constants were optimized in QuB for the entire data set across all molecules and concentrations excluding events with more than two bound ligands (see Methods in main text). Errors are standard deviations across optimized rate constants for five randomized folds of the data set where each fold contained  $\sim 20\%$  of the data for each concentration.

## References

1. Fu, X. *et al.* High-throughput fluorescence correlation spectroscopy enables analysis of surface components of cell-derived vesicles. *Anal. Bioanal. Chem.* **412**, 2589–2597 (2020).
2. Fox-Loe, A. M., Moonschi, F. H. & Richards, C. I. Organelle-specific single-molecule imaging of  $\alpha 4\beta 2$  nicotinic receptors reveals the effect of nicotine on receptor assembly and cell-surface trafficking. *J. Biol. Chem.* **292**, 21159–21169 (2017).
